# Supplementary material for: A specialist herbivore pest adaptation to xenobiotics through up-regulation of multiple Cytochrome P450s
Source: PubMed Central journal article supplement (PMC4748221; doi:10.1038/srep20421), 2016-02-10
Supplement: srep20421-s1.pdf [file srep20421-s1.pdf]

A specialist herbivore pest adaptation to xenobiotics through up-regulation of multiple  
Cytochrome P450s

Fang Zhu <sup>1,2</sup>, Timothy W. Moural<sup>3</sup>, David R. Nelson<sup>4</sup>, and Subba R. Palli<sup>1</sup>

<sup>1</sup> Department of Entomology, University of Kentucky, Lexington, KY 40546, USA.

<sup>2</sup> Department of Entomology, Washington State University, Pullman, WA 99164, USA.

<sup>3</sup> Department of Chemistry, Washington State University, Pullman 99164, USA.

<sup>4</sup> Department of Microbiology, Immunology and Biochemistry, University of Tennessee,  
Memphis, TN 38163, USA.

Correspondence and requests for materials should be addressed to F.Z. (email:

fang.zhu@wsu.edu) and S.R.P. (email: rpalli@uky.edu)

## Additional Information

### Reference

66. Mao, W., Schuler, M. A. & Berenbaum, M. R. CYP9Q-mediated detoxification of acaricides in the honey bee (*Apis mellifera*). *Proc Natl Acad Sci USA* **108**, 12657-12662 (2011).

**Fig. S1** Summary of *L. decemlineata* transcriptomic sequences. The length distribution of Colorado potato beetle transcript sequences: (A) contigs; (B) singletons.

**Fig. S2** Species distribution of the top BLAST hit in the nr database for each contig of *L. decemlineata*. A top BLAST hit is defined as the species which each sequence shares the greatest similarity to. The number of sequences for which this species was a top blast hit is shown on the y-axis. Singletons follow a similar distribution.

**Fig. S3** Gene ontology (GO) terms for the transcriptomic sequences of *L. decemlineata*. (A) biological process; (B) cellular component; (C) molecular function.

**Table S1.** List for Cytochrome P450s identified in *Leptinotarsa decemlineata*.

**Table S2.** Amino acid sequences for Cytochrome P450s identified in *Leptinotarsa decemlineata*.

**Table S3.** Statistical analyses of five candidate reference genes based on their threshold cycle ( $C_T$ ) value.

**Table S4.** Differential expression of 76 CPB P450s in imidacloprid resistant and susceptible strains.

**Table S5.** Induction of 76 CPB P450s by potato leaf GAs and imidacloprid in head, fat body and gut.

**Table S6.** Insect P450s selected for phylogenetic tree construction.

**Table S7.** Primers used for qRT-PCR.

**Fig. S1**

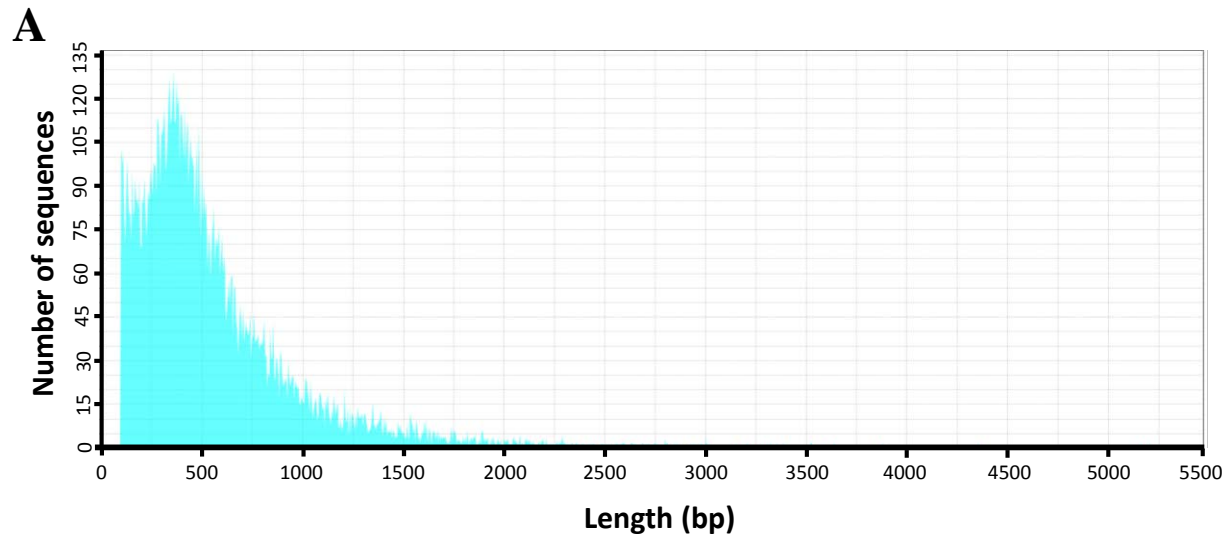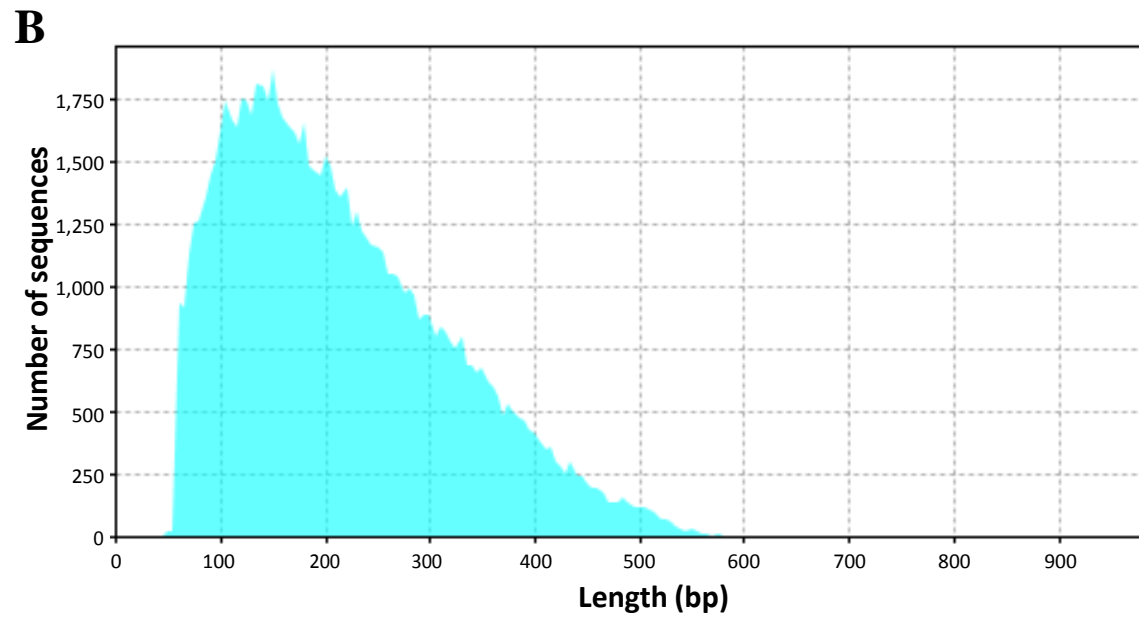

Fig. S2

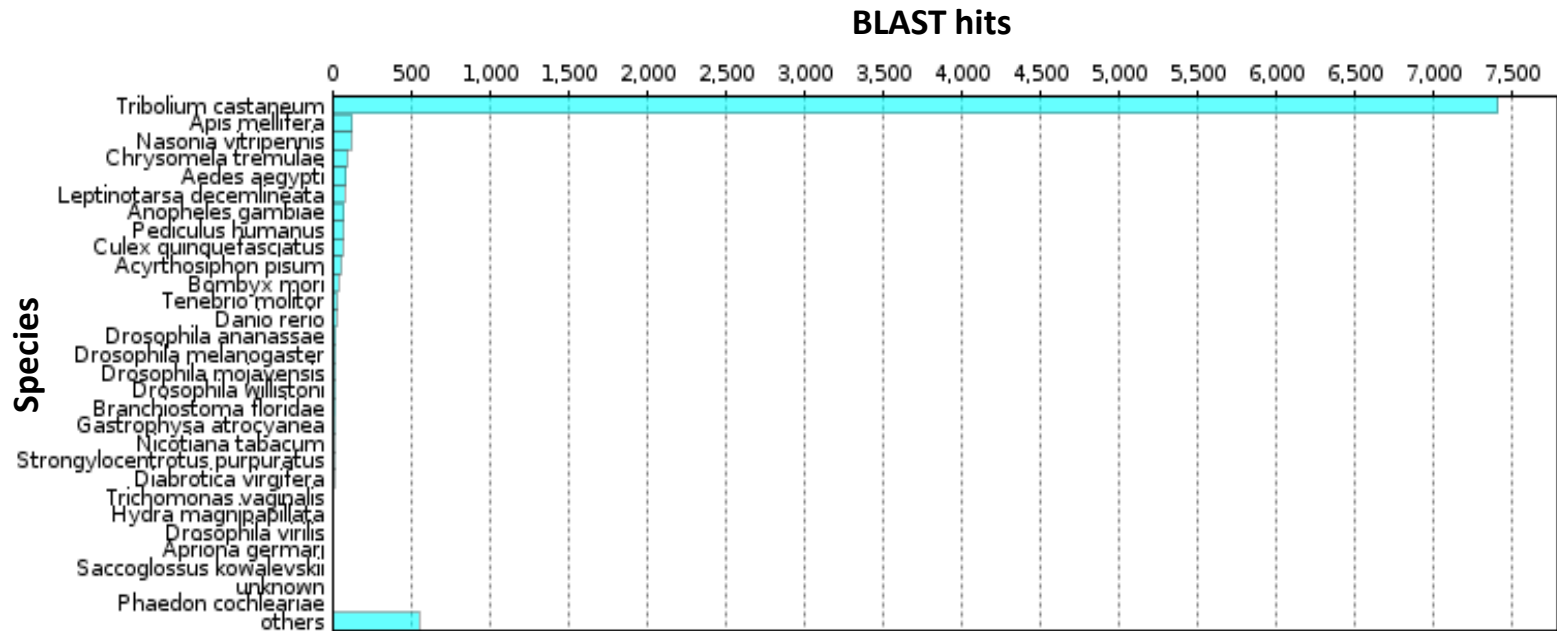

**Fig. S3**

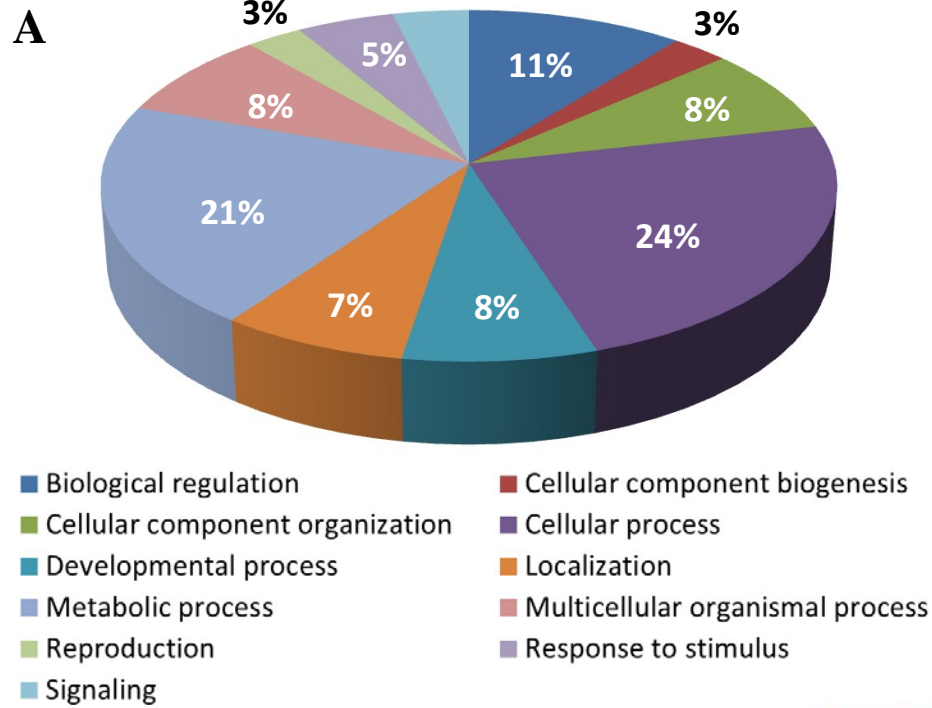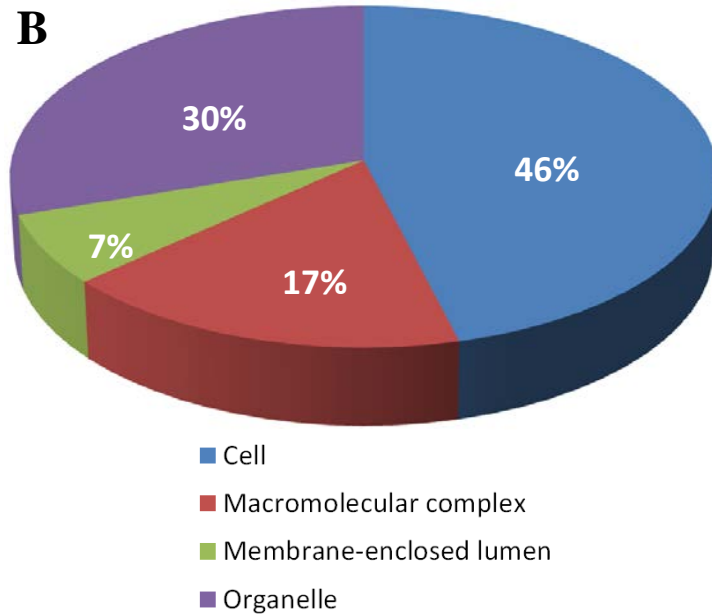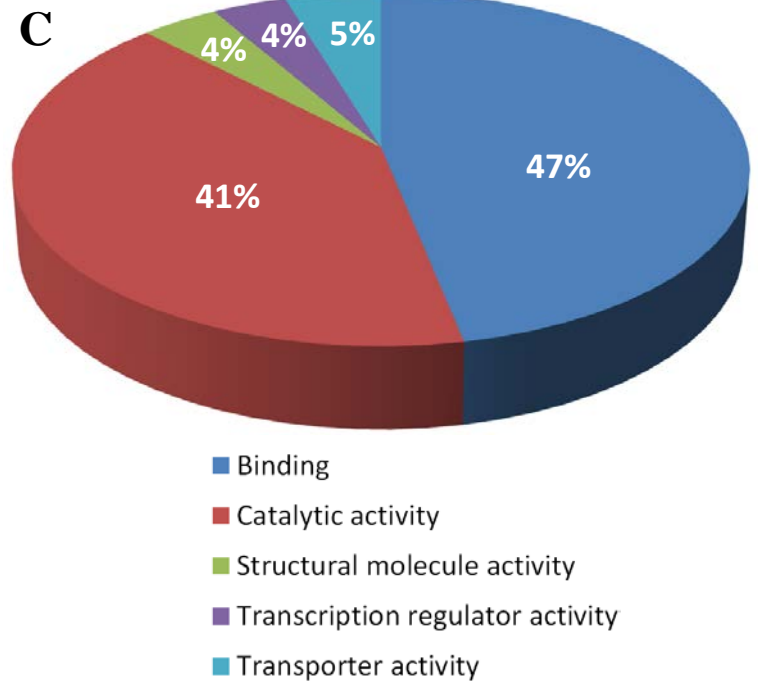

Table S1. List for Cytochrome P450s identified in *Leptinotarsa decemlineata*.

| No. | Clan | Primer No. | P450 Name*          | GenBank accession no. <sup>1</sup> /contig no. |
|-----|------|------------|---------------------|------------------------------------------------|
| 1   | 2    | Ld96       | CYP18A1             | Contig00492                                    |
| 2   | 2    | Ld110      | CYP305A1            | Contig03704                                    |
| 3   | Mito | Ld122      | CYP12H2             | Contig06799                                    |
| 4   | Mito | Ld9        | CYP12H3             | Contig04906                                    |
| 5   | Mito | Ld128      | CYP12J4             | Contig09889                                    |
| 6   | Mito | Ld8        | CYP12J              | EB758458 <sup>1</sup>                          |
| 7   | Mito | Ld82       | CYP49A1             | Contig06413                                    |
| 8   | Mito | Ld132      | CYP301B1            | Contig07011                                    |
| 9   | Mito | Ld98       | CYP314A1            | Contig00869                                    |
| 10  | 3    | Ld85       | CYP6BH              | Contig04303                                    |
| 11  | 3    | Ld30       | CYP6BJ1             | DQ117463 <sup>1</sup>                          |
| 12  | 3    | Ld113      | CYP6BJ3             | Contig12558                                    |
| 13  | 3    | Ld15       | CYP6BJ <sup>a</sup> | EB757598 <sup>1</sup>                          |
| 14  | 3    | Ld84       | CYP6BJ <sup>b</sup> | Contig10557                                    |
| 15  | 3    | Ld106      | CYP6BK              | Contig07056                                    |
| 16  | 3    | Ld154      | CYP6BQ15            | Contig08488                                    |
| 17  | 3    | Ld143      | CYP6BQ16            | Contig01265                                    |
| 18  | 3    | Ld27       | CYP6BQ21            | Contig00220                                    |
| 19  | 3    | Ld148      | CYP6BQ22            | Contig01264                                    |
| 20  | 3    | Ld161      | CYP6BQ              | Contig10876                                    |
| 21  | 3    | Ld45       | CYP6BU <sup>a</sup> | Contig09262                                    |
| 22  | 3    | Ld157      | CYP6BU <sup>b</sup> | Contig09308                                    |
| 23  | 3    | Ld2        | CYP6ED1v2           | Contig01354                                    |
| 24  | 3    | Ld104      | CYP6ED              | Contig10723                                    |
| 25  | 3    | Ld5        | CYP6EE1v2           | Contig01835                                    |
| 26  | 3    | Ld78       | CYP6EE1             | Contig03888                                    |
| 27  | 3    | Ld12       | CYP6EF1             | EB757657 <sup>1</sup>                          |
| 28  | 3    | Ld80       | CYP6EG1             | Contig02306                                    |
| 29  | 3    | Ld6        | CYP6EH1             | Contig04994                                    |
| 30  | 3    | Ld115      | CYP6EZ1             | Contig01667                                    |
| 31  | 3    | Ld93       | CYP6FA1             | Contig00754                                    |
| 32  | 3    | Ld101      | CYP6                | Contig07881                                    |
| 33  | 3    | Ld126      | CYP9A               | Contig09946                                    |
| 34  | 3    | Ld13       | CYP9AV1             | Contig00465                                    |
| 35  | 3    | Ld29       | CYP9V1v1            | DQ117460 <sup>1</sup>                          |
| 36  | 3    | Ld25       | CYP9V1v2            | EB754758 <sup>1</sup>                          |
| 37  | 3    | Ld41       | CYP9V2v2            | DQ631662 <sup>1</sup>                          |
| 38  | 3    | Ld83       | CYP9Y <sup>a</sup>  | Contig11158                                    |
| 39  | 3    | Ld114      | CYP9Y <sup>b</sup>  | Contig12257                                    |
| 40  | 3    | Ld117      | CYP9Y <sup>c</sup>  | Contig09375                                    |
| 41  | 3    | Ld42       | CYP9Z13             | DQ631659 <sup>1</sup>                          |
| 42  | 3    | Ld63       | CYP9Z14v1           | Contig01918                                    |
| 43  | 3    | Ld38       | CYP9Z25             | Contig00260                                    |

---

|    |   |       |                     |                       |
|----|---|-------|---------------------|-----------------------|
| 44 | 3 | Ld3   | CYP9Z26             | Contig00493           |
| 45 | 3 | Ld68  | CYP9Z28             | Contig01161           |
| 46 | 3 | Ld147 | CYP9Z29             | Contig01238           |
| 47 | 3 | Ld39  | CYP9Z30             | Contig03170           |
| 48 | 3 | Ld134 | CYP9Z31             | Contig01532           |
| 49 | 3 | Ld152 | CYP9Z <sup>a</sup>  | Contig06948           |
| 50 | 3 | Ld140 | CYP9Z <sup>b</sup>  | Contig03035           |
| 51 | 3 | Ld40  | CYP9Z <sup>c</sup>  | Contig08090           |
| 52 | 3 | Ld37  | CYP9Z <sup>d</sup>  | Contig04061           |
| 53 | 3 | Ld121 | CYP9Z <sup>e</sup>  | Contig08039           |
| 54 | 3 | Ld43  | CYP9Z <sup>f</sup>  | DQ631658 <sup>1</sup> |
| 55 | 3 | Ld158 | CYP9Z <sup>g</sup>  | Contig10068           |
| 56 | 3 | Ld156 | CYP9Z <sup>h</sup>  | Contig09087           |
| 57 | 3 | Ld1   | CYP9Z <sup>i</sup>  | Contig06620           |
| 58 | 3 | Ld155 | CYP9Z <sup>j</sup>  | Contig08801           |
| 59 | 3 | Ld150 | CYP9Z <sup>k</sup>  | Contig06091           |
| 60 | 3 | Ld97  | CYP9Z <sup>l</sup>  | Contig08836           |
| 61 | 3 | Ld159 | CYP9Z <sup>m</sup>  | Contig10701           |
| 62 | 3 | Ld160 | CYP9Z <sup>n</sup>  | Contig10810           |
| 63 | 3 | Ld21  | CYP9Z <sup>o</sup>  | EB755804 <sup>1</sup> |
| 64 | 3 | Ld109 | CYP9                | Contig11061           |
| 65 | 3 | Ld20  | CYP345G1            | Contig00315           |
| 66 | 3 | Ld74  | CYP345G             | EB759967 <sup>1</sup> |
| 67 | 3 | Ld164 | CYP345 <sup>a</sup> | Contig12742           |
| 68 | 3 | Ld129 | CYP345 <sup>b</sup> | Contig02242           |
| 69 | 3 | Ld88  | CYP347C             | Contig02790           |
| 70 | 3 | Ld105 | CYP413A1            | Contig09360           |
| 71 | 4 | Ld131 | CYP4AA1             | Contig07817           |
| 72 | 4 | Ld50  | CYP4BN12v2          | DQ631646 <sup>1</sup> |
| 73 | 4 | Ld118 | CYP4BN12v3          | Contig01477           |
| 74 | 4 | Ld48  | CYP4BN13v4          | DQ631649 <sup>1</sup> |
| 75 | 4 | Ld49  | CYP4BN14v1          | Contig01451           |
| 76 | 4 | Ld89  | CYP4BN15            | Contig00384           |
| 77 | 4 | Ld153 | CYP4BN              | Contig07821           |
| 78 | 4 | Ld32  | CYP4G29             | DQ117464 <sup>1</sup> |
| 79 | 4 | Ld127 | CYP4G34             | Contig09239           |
| 80 | 4 | Ld81  | CYP4G <sup>a</sup>  | Contig02645           |
| 81 | 4 | Ld141 | CYP4G <sup>b</sup>  | Contig05926           |
| 82 | 4 | Ld125 | CYP4Q10             | Contig04050           |
| 83 | 4 | Ld46  | CYP4Q11             | Contig09919           |
| 84 | 4 | Ld22  | CYP4Q <sup>a</sup>  | EB755786 <sup>1</sup> |
| 85 | 4 | Ld166 | CYP4Q <sup>b</sup>  | Contig02266           |
| 86 | 4 | Ld119 | CYP4Q <sup>c</sup>  | Contig03154           |
| 87 | 4 | Ld138 | CYP4 <sup>a</sup>   | Contig04089           |
| 88 | 4 | Ld133 | CYP4 <sup>b</sup>   | Contig06673           |
| 89 | 4 | Ld123 | CYP4 <sup>c</sup>   | Contig09902           |

---

---

|    |   |       |                   |                       |
|----|---|-------|-------------------|-----------------------|
| 90 | 4 | Ld72  | CYP4 <sup>d</sup> | EB760335 <sup>1</sup> |
| 91 | 4 | Ld107 | CYP4 <sup>e</sup> | Contig10575           |
| 92 | 4 | Ld120 | CYP349B           | Contig08032           |
| 93 | 4 | Ld142 | CYP349C1          | Contig05067           |
| 94 | 4 | Ld35  | CYP350D1          | DQ631673 <sup>1</sup> |
| 95 | 4 | Ld165 | CYP350D2          | Contig13007           |
| 96 | 4 | Ld162 | CYP350D4          | Contig11512           |
| 97 | 4 | Ld130 | CYP411?           | Contig05829           |
| 98 | 4 | Ld7   | CYP421A1          | Contig02661           |

---

\*Names here were provided by P450 nomenclature committee.



Table S2. Amino acid sequences for Cytochrome P450s identified in *Leptinotarsa decemlineata*.

| <b>P450 name</b> | <b>Amino acid sequence</b>                                                                                                                                                                                                                                                                            |
|------------------|-------------------------------------------------------------------------------------------------------------------------------------------------------------------------------------------------------------------------------------------------------------------------------------------------------|
| CYP18A1          | GGVVAKIEQNRVEMA EYMQE KIDDHKKTFDPGNPRDLLDMYVNDVSL<br>AMKEGNVDRLFH GKDPDRQIQQIMGDLFSAGMETIKSSLQWSILFMLHY<br>PDEMKA VQEELDEVVGRGRLPALDDISYLPITNATLNEILRIANIVPLGTT<br>HAPTRVIKLGKY TLPKHAQVVPLLHYVHMNPD LWDEPEKFNPSRFISSE<br>GKLLNPECFLPFGEGRRKCLGEVMARMEIFLFFSSILHSFDLSVPEDHPLP<br>SLKGIAGVTLNPN AFKVVP |
| CYP305A1         | WTFYFWLGRQTTSNTLDF AFLMMLLYPEIKDKVHACLDEAFQKSEEITYS<br>ERKRVPYVEA VLYETERFCTI APIIGPRRVLRKTTLN GYDIPKDTTVLIHIIH<br>LVHNDVDY WQDPEIFRPDRFLDPKGNLMYHDRFLPFG LGKRRCLGEILA<br>KNCIFTFFSQIMKSYQIELPPNAKKPTGVPQPGITLSPEKYRAIFIKR                                                                            |
| CYP12H2          | LFLPWSTPITTTIRALHPAIEFRYISCTCLPFFCFFGGT LTAMLIRCASRPLA<br>LGARAVSASSSKPCAGAAA VSKREDDYKTLGEHVDESKPPGWDSARPF E<br>EIPGPKPLPIVGNLLRFMPFCRGA VQDSNLGDVPKIQGTIWRGN                                                                                                                                        |
| CYP12H3          | MGTFTAMFTKYASRSFLLRTRKVS SKPGAGPAAVSKRDDYKTLAEDT<br>NESKPPGWDSALPYEKIPGPKPLPIVENLRLLPVV GELPKSPILKMLNQS<br>REQYGDVVVWKNILGKPD SVYIYNIKDIENLLRNSGPYPVRTVLDIFVYY<br>RTVLRKEIFQDVGGVLT VQGEDWFKIRSVVNPILMQPKA                                                                                            |
| CYP12J4          | RAGHFKDPEKYM PERWLRDTNDEYSSKNVHSFASLPFGFGPRMCVGM R<br>FASLELELVLMKIIRNFELSW EHPDMEFASHLLYGINNPLKLT VKELTR                                                                                                                                                                                             |
| CYP12J           | ESCIKESTRIAPVTIGSFRTTVKDLVLGGYQIPKGTNITVVSICTS NSSEHFK<br>DPEK FVPERWLREIDDDYSKNVNFASLPFGFGPRKCVGMRFANFELEL<br>VLMKIIRNFELSW EHS DMEFASHLLYGISNPLKITVKEVTR                                                                                                                                            |
| CYP49A1          | NLAKMSSGATR KLLAPKVIRAFKRSYSKDRPYSTALGVM PRVYEDDIYE<br>YKVEKVDVITKDYSEIPGPKELPLIGNA WRFAPLIGQYKI HDL DKVMWSL<br>RKEYGKIVKVGGLVGH PDLLFVFDGDDIK                                                                                                                                                        |
| CYP301B1         | QHYVISNLEQYFPRSKEFLPERWLKSCPF SKEQHPFASLPFGFGKRMCLG<br>RRFVDLEMQTALAKIIRTYKIEYHHEKLDYFVHPMYTPNGPLK LKFIKHG<br>S                                                                                                                                                                                       |
| CYP314A1         | MARVTDFSDK KLTSPKTVAGFLPQVQEIVEDWCNLISQQRTDNTITNLED<br>IVGPLGLEISCALVLGRRMGFLLPGA ESETAQKLAETIHLFIATRDTYYG<br>LPFWKIFETPAYKLAES EDTIYQLVTNLISTADQAANRSPVFQSVLDANI<br>NQKEKTA AIVDFIAADIHTLKN SLVFLLYLVAKNPGTQEKILE DSSKSYLR<br>ACIMETFRIYPTANCLAR                                                     |
| CYP6BH           | NSITMNYLLELLIFLVTLSISVTIFVHYRYGYWKRRNVPY LKPIFPMGNNT<br>SFFPKEYPLELYPNIFTMNSRRWDARSEVYSLGSIRN WLSWIRTSPKIF                                                                                                                                                                                            |
| CYP6BJ1          | MVFSTDNLLLDLFGVLVALSAVLFVYIKRSFQYWDRKGV PYP LPPNIPWG<br>NLQPPHSRDIPEGDDVANIYYKAKAKGWKYIGIYVMTGSVFLPVDLELIK<br>HITTKDFQH FVDRGTYVNEKDEPITAHLSIGGKKWRNLRTKFTPTFTSG                                                                                                                                      |

---

KMRQMFETIANCGHILEKYIEHEVDHHEPLDIKNVLACYTTDIIGSCAFGL  
 DCNSFKEPNSPFTQFGQRVFRTDGIRNLKITFMGAFPNSKMLRMRLTEK  
 EVEDFYTKVVEDTVRYREKEGVTRPDFLQMLIDIKNKTNEHTGDGTSLT  
 MDEIVAQSFVFFIAGFETSSTTMTFALYQLATHPEIQEKVRSEINSVLEKH  
 NNQITYDALNELKYMKGKVIDETLRMYPALPVVTRRCVEDYRIPSDSVIE  
 KGIEVFIPIKAIHYDPEYYENPEVFDPERFNEENIQGRHPYAHIPFGGPRIC  
 IGLRFGVMQSKVGLVSILKNFRVTLSSKTKLPLKIDVNSFIPTTEGGMWL  
 NLERIGK

CYP6BJ3 ERPKDFQHfVDRGTYVNEKDEPISAHLFAIGGKKWRNLRTKFTPTFTSGK  
 MRHMFETIANCGLILEKYIEHEVDHHEPLDIKTVLACYTTDIIGSCAFGLD  
 CNTFKEPNTPFTQLGQRVFQTDRIKSLKIAFMMAFPDVSMLRMRLWPL

CYP6BJ<sup>a</sup> EPFRKIMVSFTDNLDDLFGLLVALSAVLFVYIKRSFQYWDRKGVYLP  
 RIPWGNLQPPHRIIPFGDDVANIYNKAKAKGWKYIGIYVMTGSVFLPVD  
 LELIKHIMTKDFQHfVDRGTYVNEKDEPISAHLFAIGGKKWRNL

CYP6BJ<sup>b</sup> GVMQSKVGLVSILKNFRVKLSSKTKLPLKIAVNSFIPTTEGGMWLNLERI  
 AK

CYP6BK KNEISSNGPKLTMNNVAALSFGFLFIGGFETSTSSFTFCMFELASHQNIQDK  
 VREEVKTVLARHNNEFSYESLGEMKYLRQVLDENWRLHPPAHTINRRCT  
 KDYKVPGEDLIEKGTNLVTITGIHRDPEYYPNPLVFDPDFSEE

CYP6BQ15 EENKSKRHPFAFLPFGEPRICIGARFGLLQVKVGLTAIRNFKVTLNENK  
 TP

CYP6BQ16 QIMTFLLTVTYILGAVIVGIYLLLKWIYSYWYRKGVVEYIEPDDFFYGNVKE  
 MIQRKVSGLGFLFKFYDNLKSRGLKYGGCYTFFSPVFPVLDLVIKSIK  
 DFDHFVNRGMYYNEKVDPLSTHLFTLEDERWKSLSKLTPTFSSGKLKM  
 MFPTLVSCSFGLEDVLNEYSAIQDAVDIKEVSSRFSTDAIGSVAFGIDCNS  
 LKNPNSEFRQWGRQMFLGGIRGIIKAIMLMTLPNSFLHVIRFKMTSKSTE  
 DFLMNVVRDVTVDYREKTMCIKTSCIYYYS

CYP6BQ21 ESQVWWNIRFFSPVFIPIDLNLVKSIMLKDFHFFVNRGGYVNEKADPLSG  
 HLFSLEDEKWRNLRAKLTPTFTSGKLMFMFQTLVACTSGLEDILSEHSIL  
 QDAVDIKEVSARFTTDAIGSVAFGIDCNSLKNPDSEFRQWGRRIFKGSIRG  
 QIKALMLMTLPNNFLHAIGFKLTNKTTEDFLMNMVRKTVDYREKNNIYR  
 KDFMHLLLQLKNRGKVTDDANITKEEEKNKGSDTLSENEVAAQCLVFFI  
 AGFETSATTMTFALLELSLNQDIQDRLRQEINMVLKHKHDMQFTYDSVME  
 MKYLEKVIDETLRKHSAAATVLRVCKKAYTIPGTNVVLDEGTAVNIPVL  
 GIHRDPEYYPEPKFDPERFNEENRARRHPFAYMPFGGPRICIGARFGLL  
 QTKIGIAAIIKNFKVTLNEKTKTPIRYSPSARITGVDGEVWLVNVTIKI

CYP6BQ22 YSHNNDVSAIDFYFGRIDSWRLFHKTDFLLVPERSGVHRTRLFYGNIK  
 EMVHGKISTGGLFKFYDDMKSRGLKYGGCYTFFSPVLILVLDLIIKIL  
 LKDFDNFINRGMYYNEKMDPLSAHLFSLEDERWKNLRAKLTPTFTSGKL  
 KMMFPTLVACSGLEDVLSEYSVIQDAVDIKEVCSRYATDAIGSIAFGIDC  
 NSLKNPDSEFRQWGKQMLKGA

---

---

|                     |                                                                                                                                                                                                                                                                                                                                                                        |
|---------------------|------------------------------------------------------------------------------------------------------------------------------------------------------------------------------------------------------------------------------------------------------------------------------------------------------------------------------------------------------------------------|
| CYP6BQ              | DMQFTYDSIMEMKYLEKVVDETLRKHSAGTILTRICNKPYTIPGTKVVIE<br>KGTAVYIPVSGIHRDPEYYDPDKFDPERFNSNK                                                                                                                                                                                                                                                                                |
| CYP6BU <sup>a</sup> | ARHPFAYLPFGEGPRNCIAARYGLLQTKVGISAVIKNFKVTLNKKTKTPI<br>RYVTSGRIPPEIEGGVWLDVTKIQ                                                                                                                                                                                                                                                                                         |
| CYP6BU <sup>b</sup> | ARHPFAYMPFGEGPRMCIGARYGLLQSKVGISAIKKNFKVTLNDKTRTPIR<br>YAKTGIIPRIEGGVWLVNVTIKQ                                                                                                                                                                                                                                                                                         |
| CYP6ED1v2           | SYNFIGSMEQYFFNLLFKLISSVGIVFFILYCFFLSYYKYWEKRNFPYLPV<br>RFPLGNSQSLFCKFPGPNLEFTDHYREIKKKGKYGKAGVFATIRPILVIADT<br>EIVKDILVKDFDHFADRGFYKTASDPLSVTLFSMDAVEWRKTRIRLPTF<br>TSGKCLKMMFPLIICVSA SMIEEIDDLAKENSDIDIKKIATNFTINTLAICTLG<br>IEPGKSESSYILSEMAQKHFDVHTPIDLLRYSLMNRFDPDFSSILGLKLLKKE<br>VSEFFITVVRDAMKYREEMKLFRLDLELLMNIKNETNNSPNPLTDNQLI<br>AEIFDFLSCVTRHIFSHNFFHFYSN |
| CYP6ED              | PRNCVGNRFGIMVTQVALIEVLRMFRISVSSSTILPFEMDKQTLILVLKNPI<br>LLKAEKINNECDNLMI                                                                                                                                                                                                                                                                                               |
| CYP6EE1v2           | YQRRYMGVHLRLLSLHSDCDLFFINFIVVPGIMELLIFDYLTCTLVYSSIL<br>ATFIYLYFSWCYGHWRNRNFPFLKPNFPKGNNTYLARFPGPHLECRDH<br>YLEIRKRGLKFAGIFCVIHPILVVDPVVIKDILVKDFEHFVDRGFYSSND<br>PLSVSLLSMGGDKWKNSRGKLTNFFTIGKVKMLIPLMVGSAKPMVRSIR<br>ECASNNTDINITLLTKRYAAETVGTGFLGIDCNNFGDVEDTFANMVGKFF<br>RDQNFTHLLRVSCTNRFPALSARKVGLKLLSEVSEFFKSAVRDTLKYREE<br>HNYFRPDVLQLL                         |
| CYP6EE1             | KLSGILRPGLPSLERECVKDYKINGTNLTIEKGTTVWISIMGIHRDPEYHT<br>DPEKFDPRFIEDSAKSYSQFYFPFGLGPRMCIGVRFGLTVAQIGLIRILRE<br>HRMSLSDETCTPLKLNKQSFLLETLEPLLMRAEKI                                                                                                                                                                                                                      |
| CYP6EF1             | GPIKKSIMGILSVEILGTFSMVMLICFSTIYLYFNISYQYWKRRGVPYLPK<br>KFPTGNSSSLFRKTRVFPLATMDFYKEIKKRGWKFGGVYTVLRPVLVIV<br>DPALMKNILLTDXQYFIDRGFYNEKDDPISAHLFALDEKSWKNMRIKL<br>TPTFTSGKMKMMFPACS                                                                                                                                                                                      |
| CYP6EG1             | VEPRLIEKTMFILPLLSHLVIVIVFLILVLIAFYKWSFLYWKRRNIPFLEPSIP<br>FGSLMNLTRKISRIEELTMMYNECKKRGYKHCGIWQLADPTYFVVDL<br>ELLKNICIKDFEHFADRGFYFNEKDDPISAHLLSLDGDRWKTLRKQSSSTIF<br>SGAKLKGMFPNVLACAESLENYVASLVENGSPVNVKDIASSFAVDSVG<br>SSTLGIKCRGFTDPDKKFIHYSKQALETDRKSQLRMLFGIFFPNAARKMG<br>MRQQNKDIGDFFTNVICDTVQKRKAQNVERND                                                        |
| CYP6EH1             | AFVQCFHSYCGVESFLIQVSQSVRELNMFDLSPSTLFLLGIFICLSGYLLW<br>FFYEHHQYWKRRNVPYLTPITIPFGNTLDLFRGKISFGEVFSRAYLELKKQ<br>GHKHGGIYYLQKPVYIPVDANIKKIIISDSDNFPNHGMVNPADDPLSGH<br>LFNIEDGRWRTLRSKM                                                                                                                                                                                    |
| CYP6EZ1             | HGQWNKYKNSMVVAVPRHILEKLSFRIFSKETEKYVLKMFKDILRYRKF<br>DSPLREDLTASVVKLTEWREEEKDFSGKKVMVPLEESEFAAHMFLFFCA                                                                                                                                                                                                                                                                 |

---

---

|                    |                                                                                                                                                                                                                                                                                                                                                                                                                                                                                                                                                                                         |
|--------------------|-----------------------------------------------------------------------------------------------------------------------------------------------------------------------------------------------------------------------------------------------------------------------------------------------------------------------------------------------------------------------------------------------------------------------------------------------------------------------------------------------------------------------------------------------------------------------------------------|
|                    | GFETSSSTQTFALFELARNPECQNKLRLKEINTVMAKHGNEVTYDAIMEM<br>EYLDNIVDETLRMYPVFPILPRICKEDYPIPGTDLILEKNTFVMVTNLGIQR<br>DPEYYPNPEQFNPERFNREIRESFHISQIYLLVKDPEFAWEKDSVCGKPN<br>WA                                                                                                                                                                                                                                                                                                                                                                                                                  |
| CYP6FA1            | SSSTVFFFFLAGFETSSTTICFASYELALHKEIQDRARHEIKEVLKKNNEI<br>TYDALMEMHYLETVIYGTLRKYPLQFLLRKCTDNYKVPDSNIVIEKGM<br>VTIIPVLGLHFDPEYYPDPEKFDPERFNAENKKTIPQFAWLPFGEGPRICL<br>GLRFGMVQVKIGLISLLKNYEFTLHEKTISPITYTKTSVLASAKGGIWLNL<br>RKIH                                                                                                                                                                                                                                                                                                                                                           |
| CYP6               | TGSAVWYTTTRKIFFRTMSITGYFFHDLVLVWISLMIITITYYKHAFKYWS<br>QRGVDGPEPTVIFGNGWDVANGSKTMGELWKKIYLELKSGLRHGGGY<br>FMAKPMYTVVSLDLVKAIMQTDYQYFN                                                                                                                                                                                                                                                                                                                                                                                                                                                   |
| CYP9A              | LLVPLACNATPSKNDKNDFFTMGSRMTKPTGFNVIKGILAAFFPHVFEFF<br>RIPIPSFVTKF FQDLIKETISVREKIISSAQI                                                                                                                                                                                                                                                                                                                                                                                                                                                                                                 |
| CYP9AV1            | LFRQDVLRLINVDSFAEPNNEFWQMCHKA VDTISKPKVLSFNVYLLAPKL<br>VKFLKMKIVDWDADSFFRQIISDTMKIREKERENGILGADLIHLLLEGRK<br>RAKMNKDKETNVKSTYKNYNADWSNMDIIAQAFFHFASCAPAPTLLSF<br>MGYELAVNPVQEKVREEIRETDEICGGKLTYEVLNRMKYIDMVVQES<br>MRKWPSVIEVDRICSKDYVIQPVLPPEKPVLVKRGSRVIVPIYSLHHDPOF<br>FPEPERFIPERFSDENKHKIKPNTFTPFGFGSRTCMGSKYSILQAKL                                                                                                                                                                                                                                                              |
| CYP9V1v1           | MLTTIVLALLAVTAFYYLFIIRPLSYWKKRNIKQGNPVPILGDYWWFFFK<br>MESFADLVRRLYNQFPNERYCGIYQYVTPTLMIRDPELIKQITVKDFDHF<br>VDHRAVMPETS DPLWAKNLFSLTGQRWREMRPVLSAFTGNKMLRMF<br>GLISECADDYVSFYLEKNQDVIDVELRDTITRFTNDIAIATTAYGIKVDLSR<br>NPANDFYVKSRAFTLSSFLALKFFSTLLLPTFIVNLLNLKIFEKEISDFFIT<br>IVDETIKIREEKGIVRPDLIHLLEARKGHYRYEEESGTTDTGFAAVKESD<br>IGKHIRQKIEITNLDIAAQALVFFLGGFDSSASLMCFMGYELAVNQDIQRK<br>LRIEIEDTLEKNGVITYDALLKMKYMDMISETLRKWSNGVIADRVCTK<br>PYTIEPVTAEKPIHLAEGTFIIPSGFIQHDPKYFPDPDRFDPERFNEENKD<br>KINSYTYLFPFGIGPRNCIGSRFALLETKLLFFKLLSKFEIVPTTKSGIPLKIST<br>TTLNLNSEGGLFAFKRLNGNQ |
| CYP9V1v2           | NMLTTIVLALLAVTAFYYLFIIRPLSYWKKRNIKQGNPVPILGDYWRFFFK<br>MESFADLVRRLYNQFPNERYCGIYQYVTPTLMIRDPELIKQITVKDFDHF<br>VDHRVMPETS DPLWAKNLFSLTGQRWREMRPVLSAFTGNXMRLMF<br>GLI                                                                                                                                                                                                                                                                                                                                                                                                                      |
| CYP9V2v2           | PFTAGPRNCIGSRFALLETKLLFFKLLSKFEIVPTTKSGIPLEISTTTLNLNS<br>EGGFLFAFKRINGNQ                                                                                                                                                                                                                                                                                                                                                                                                                                                                                                                |
| CYP9Y <sup>a</sup> | FSKFIRPVLYWKKKNIFYVTPWKGFLRVLFPGPKSFFELIVEAYRRFPEKRY<br>YGSYQFLNPSLFVTDLDLIKQITVKDFEYF                                                                                                                                                                                                                                                                                                                                                                                                                                                                                                  |
| CYP9Y <sup>b</sup> | NGVNRSDHSSGSGFLFAGFDTSSTLLSFLSYHLAVDQKIQTTLQKEIDN<br>VTKLGDGRVSYEELLKMKYLDQVISETLRRYPPGFMLTRICVAAR                                                                                                                                                                                                                                                                                                                                                                                                                                                                                      |

---

---

|                    |                                                                                                                                                                                                                                                                                                                                                                                                                                                                             |
|--------------------|-----------------------------------------------------------------------------------------------------------------------------------------------------------------------------------------------------------------------------------------------------------------------------------------------------------------------------------------------------------------------------------------------------------------------------------------------------------------------------|
| CYP9Y <sup>c</sup> | LSKFDIIVIKKTPFPLLSKTFNLAGREGIWLGLKKREKF                                                                                                                                                                                                                                                                                                                                                                                                                                     |
| CYP9Z13            | PFGEGRNCIGSRFGLLEIKTVFFHILSHFELIPTEKTIPLKLTKKTFNLGA<br>EGGFWLGLKRLKK                                                                                                                                                                                                                                                                                                                                                                                                        |
| CYP9Z14v1          | YVIEPTNPEEKPLYIEKNTLLMIPIVGIHRDPKYYPEPMRFNPERFSDENKG<br>KIDPFTYLPFGLGPRNCIASRFALLEAKVFFHLLSHFELVPVEKTIPLKIS<br>KQSFNMVAEGGFWLGLKRLKK                                                                                                                                                                                                                                                                                                                                        |
| CYP9Z25            | RCRTSVEQKFICINRKKWRDMRPILSPTFTSSKMRTMFLDISDCSEKFKH<br>FVENNENCIEIEMKNIFTRFTNDVIATTAFGVEVDSMKQPNNEFYLMGKE<br>VNNSTGFWRLKIFGYFIIPSVYHFFRISVSPFTKKISMFFRELVDITIKFRE<br>ENNIVRPDMIHLLMESRKGIEHKEENVDIGTGAFVEESFMGKGISGKEIT<br>NTDITAQALIFFFAGFEQVSSLMCFMALELAIHDDVQTRLREEIKKTISSC<br>GGNLTYEALMKMKYMDMVVSETLRKWPTTVLTDRICTKAYIIEPQNP<br>EQPLHLERNANITIPMFAIHRDPKYYPDPDRFDPERFNDENKLNINPYTYA<br>PFGFGPRNCIGSRFALLETKLIFFHLLSHFELVPVKKCTPLRASKKSFNLV<br>ADGGFWVGMKRLTKSMKSTLSTHT  |
| CYP9Z26            | MIQLVLVAAVLAALLYFCIKPMNYWRERGVKQNDHPVWLFGENWRT<br>TIRKESFFELVVRVCYNQFQGTRYHGIYQLIQPTLLIKDPELLRKITVKDFD<br>HFTDHRSSFSEETDPLWGKNLFTLRGRKWREMRPILSPSFTSSKMRTMFV<br>LISKCSKDFVNHFLKKDQDCVEMEMKDTFTRFTNDVIATSAFGVKVDSL<br>EENNEFYSMGKRATDFSGFAMMLKFIGFFVAPDLLKYLRISFMDSAVN<br>RFFCDLVDNTIQVREKNNIIRPDMIHLLMEAKKGVHKKDENSQVDTGFA<br>TVVEADLGEHVTEITNLDITAQALIFFFAGFDSVSSLMCFMSHELAVNP<br>NIQTKLRNEIETLAGCGGEITYEALLKMKYMDMVISLSLRKWPSAVAT<br>DRVCTKPYTIEAMNSDEKPLLIEKGTTLMIPIVGIH |
| CYP9Z28            | MFLIIIGTAILAALFYVVCIKPMSYWRERGVKQTDPIWVFGDNWMTATK<br>KESFLDFIIRCYNYPGARYYGVYQFLQPTLLVKDPELLKKITVKDFEHF<br>TDHRVLISESDPHFGKNLFALTGKKWRDMRPILSPSFTSSKMRAMFVL<br>MSKCAEDFTNHFLKKDQECIEMEMKDTFTRFTNDVIATTAFGIKVDSLEE<br>PNNKFYLMGKETDFSGFWKSLKMTGFFLVPKLLQYLRLSFLRSATQFF<br>SELVDETIKTREEKI                                                                                                                                                                                     |
| CYP9Z29            | MIELFLGAAALATIFYFYIKPMNYWGERGVKQEGHPLWLFVDSRKS<br>GKESVFDVSVRSYNQFQDTRYHGIYDSTRPILIKDPELLKQITVKDFDHF<br>TDHRNHIELDVDPLWSRNLFFQKGEKWRKMRSILSPSFTSSKMRIMFVLI<br>SKCTENFVNHFLKKDEKCIEMEMKDTFTRFTNDVIATSAFGVEVDSLEEP<br>NNEFYSGKKSTTFEGVSKLFMFIYPLVPKLIIEYLQIPFMDPVVYRFFCD<br>LVDNTIEVREKII                                                                                                                                                                                     |
| CYP9Z30            | EDITAQALVFFFAGFESLSSVMCFMAYELAVNQDIQEKLRMEISESFEKC<br>GGELTYAVLVNMKYLDMMVSEVLRKWPTQTAERVCSEAYTIPTTPEE<br>QPLHLEKGSIIVFPQFGIHRDPKYFPDPERFDPERFNDENKSNIVPFSYQPF<br>GQGPRNCIGSRFALLEMKVLFYLLLNFEIVPIERTRIPLVLSKSSILVSVE<br>GGFWMGLKHIEK                                                                                                                                                                                                                                        |

---

---

CYP9Z<sup>31</sup> MMLIIGILVAVVILLYLLL VKPLSYWNEKGVKQESILRALSFNWFSIFGRQ  
SVALYVKNMYDQFPNER YSGIYQMNAPVLVIRDPPELMKLILVKNFDHFT  
DRRTYVPEDMDPLWAKNLFALKGSKWRNMRSTLSPAFTSSKMKRMFILI  
KDCAESLVEHFSKQNQEIISLDMKDTCTRFCNDVIATTAFGVKVDSLADP  
NNEFFLMGMKATNLNTLKKTFQFLGYLLAPKVYRLFNLKFFDHDVSSFF  
RKLIDETVEAREKRGIVRPDMIHLLMEARSGIVKEEEISVEETGYASVQES  
VEGDTMTNIT

CYP9Z<sup>a</sup> DEKPLHIEKGTLLMIPMVGIIHYDPKYYPDPERFDPERFSDENKRKIDPFTY  
MPFGLGPRLCIGSRFALLETKLLFFHLLHFELVPVEKTQIPLKLSKLTFNL  
TAENGFWLGLKRLKK

CYP9Z<sup>b</sup> SFIENEIYGYGCIRIVEKMAKPIATDRVCTKPYIIEAANPDEKPLHIEKNTL  
VVISIIGIHLDPKYYPEPLRFDPERFSEENKGNINPSAYMPFGAGPRNCIGS  
RFGLLEIKTVFFHILSHFELIPTEKTIPLKLTKKTFNLGAEGGFWLGLKRL  
KK

CYP9Z<sup>c</sup> DPKYYPDPERFDPERFNDENK GKIDPFTYMPFGLGPRNCIGSRFALLETK  
LLFFHLLSHFELVPVEKTQVPLKLSRKT FNLTAEKGFWLGLKRLKK

CYP9Z<sup>d</sup> DPKYYPDPERFDPERFSDENK GKIDPFTYMPFGLGPRNCIGSRFALLETKL  
LVFHLLSHFELIPVEKTQIPLKLSRKT FNMMAEKGFWLGLKRLKK

CYP9Z<sup>e</sup> FYILLNFAIVPVEKTKIPLVLAKSMFHLGAEGGFWLGLKRLKK

CYP9Z<sup>f</sup> VHIEKETLIMIPIFGIHRDPKYYPDPLRFDPERFSDENKGNINTFA YMPFGL  
GPRNCIGSRFGLLETKLIFHLLHFELVPVEKTSIPMKLAKGT FNLM AEG  
GFWLGLKRIKK

CYP9Z<sup>g</sup> PRYHSSGCAIFFAGFDTVSLLMCFMSHELAVHPDIQTKLRDEIEETLAECG  
GEVTYEAILKMKYMDMVISLRSKWPSTISTDRICKPYTIEAKNA

CYP9Z<sup>h</sup> YYHILSHFEIVPVEKTKVPLEVAKIPRLNAEGGLWVGLKRLDC

CYP9Z<sup>i</sup> DPERFSDENK GKIKPLTYQPFHGPRNCIGSRFALLEAKVLFYYILSKFEI  
VPTEKTTIPLVLANNIVLAVEKGFDMGLKRLKK

CYP9Z<sup>j</sup> RINLKTMLLLLIGLLVVAAILVYFSLVKPLSYWKKKGVEQENFLKAFWFN  
WFGICGRQSLVSYVQNMYYQFPNRRYSGVCQLNVPVLVL

CYP9Z<sup>k</sup> DICKMIQWFLGAAALAAIIYYFCIKPLSYWRERGVKQNDRPTWLLGDDW  
KFIIRKESFFEFTVRCYNQFQGTRY YGIYESGQPTLLIKDPEILRKSLLKILI  
TSPITETLFRRLIHYLAK

CYP9Z<sup>l</sup> MLQLLFGVAILAALFYFCVKPLNYWRERGVKQTSKVWLFNGDNWSTTI  
GKESFLDMFVRCYNQFPDSRYHGIYQF

CYP9Z<sup>m</sup> QKCIEVEMKDTFTRFTNDVIATS AFGVEVDSLKEPDNEFYLMGKEATDL  
GGFGIMFKFIAYS LVPPELMKFLRITLLKQAVIKFFCDLVD

CYP9Z<sup>n</sup> IVVIEMKDTFTHFCNDVIATTAFGVEVDSL ANPDTEFYRMGKKATDLSRP  
GKQLRFIINIVAPWISKVLGVKFLKMTLERFRKPYNW

---

---

CYP9Z<sup>o</sup> FTEKMLVPVILGAVLVLTYYFNLYRPLCYWQNLGVKQDNPLTLLKLL  
LTFYNVIFKREDPLEAVINRYDKFPGSRYYGIYEMTSPGLMVKDADLVT  
QMLVTDYVHFNDHRVLIHDDLPLPSVFLPSKEKNGXR

CYP9 PRRYLPFGIGPRSCIGSSFRISYGSNSSYRNFEKIQRCEPINMFAYGYG

CYP345G1 VGDGSLKIVHRAVFKKVVWFSFQFENYDKMFPSSSNFSVDISICLSTIILL  
LYWTRNFNYWKNRGIPYKKPIPFNGIKDVLTFRKSIGMNLKDIYDEM  
DGPYLGIFIMDKPALLLKNLDVIKNILVDFNFCDRTLTQRKSDLGSSLL  
PLMKNPDWKA YRKLTPAYSSGRIKTMYNIVVDNGVELVRHIAKIMEKT  
DVMDARHEATLYGAEVITSTAFGLKGDCFEDENSGFKKAAERIFDFNDR  
SRAIATSCYMMFHSLVHIFRLKFVEPRSEKFLKDEFFKTVKYRQENNITRS  
DFVDILMNLKKNKVNVEVQMDDEKMVAQAITFFIAGFETTSATISFSLYE  
LAKNPEIQEK

CYP345G KMFSIPTLTIYITICLSAIIILLYLYWTRNFDYWKNRGIPFEKPLPFFGNLKD  
VLTFFKNIGMSPKDIYDKMEGPYLGIFLVDKPAL

CYP345<sup>a</sup> GFETTSSSISFTLHELCLNREVQNKVRAEILETIKNHGGITYYESIQDMKY

CYP345<sup>b</sup> MLLIPSWILQLIIFIVFLICFLWMYSVRNFDYWKKRGVYSPKPTPFLGNIG  
ELVFLKCLSEWLSL YFSTDERFFGVFMFDEPSLVLDPKLIQLVMMKD  
ADYFPDRSNAEPQDEIMSNFMFFKKVLAGKVIEQN---  
NKIDSCFTSGKCLKAMFSLMHNVAEEMVKYLEDNVGKIEAKDISARYSTD  
VIAKCAFGIDAYCFDDQESDFRKYGRMLLEFSLRNAFSQMSYFFIQTWV  
KIFHINLFSEEVARNYFSQAFTQTMKSRELSKTRVNDVFDLL

CYP347C ARSVLRGTLIRQQIHSQKIYPLLWNQGLRSFLPVGALQNDPKYFKDPEKFI  
PERFSSKENYNRYTYFPFGEGQRECLGKRFGTTQIKIGVAHLVKNFQLTV  
DRKTQLPLKFDPLYFLISAVGGLWINVRKIE

CYP413A1 ISRWKHRRDLVNMSYCSPYDKTSFLYYVDENKLFSGITFFTF AVIGVFCYI  
LRCYSFFEKHKIPRAVTPFAPYGN I

CYP4AA1 TSRIINIIMKYLLASSAVVILFLIYIRTYLRSVYLALKLPGPALPIIGNVFLF  
NDDREMEHLGNKAHEL YGSFMRFWVSFLPCIVVHEPRHLNII LGTNRYS  
RK

CYP4BN12v2 AGTRNCIGQKFAMLEMKSIISKVLRHFEILPATPEHKLKLAPEIILVSKNG  
VCISLRKRFEL

CYP4BN12v3 VSINAQENSHSEYVRSVKEICAIVISRIFSPDPRLYPLTWTSIREKIAVKKL  
HAHTNFIERRMKKVAVNGIDDGIDVGERRNWRFWTCC--  
RAPS RGNPCQWQTLGRKLRLCLRGMILHHPFLRYIVWQHTQKCRKK  
LQKNKKRLFGNLKEVRPKAQDLNNMKYLELVIKEVLRLYPSVPFLGRKI  
PEDFEWGGNNLSERSEYPVAYICKSSESQLFPGAIEIYSRKIRKL

CYP4BN13v4 QKFAMLEMKCTLSKILRN FELRPATPKHTLKLTP EAVLKSSNGVRIQVRP  
RKL

CYP4BN14v1 KRMAFLDLLLQTPDETLT NEDIRQEVDTFMFAGHDTTASAVSFIIYCLAE  
HPEHQEKSWKNWKPFLETTNLGR---

---

---

CYP4BN15 QSRICKSMKYTEMVINETLRLYPSVPFTGRILNKDVKYEDGKILPEGLSLI  
LYIYGANRNGQYYEDPNTFNPLRFESEKPAPYSYIPFSAGPRNCIGQKFA  
MLEMKATVAKLLLKFEIVSCGHVPILAAETVLFKNGVKVTLKTRM

CYP4BN MSFVLGTIFAVIVA VLG YR WYNLLSIKQKLNWVTHIPGWPLVGNALFEG  
GTEVLLSDMSRLFKKHGKILFIDFVGKANIFTVDYDFIEFVLGTHYILDKS  
RDYRFIRNWLGTGLLTS DGPKWKGRRRIATPAFHFSILEQFVEIFEKNGNI  
MINKLKEVDKDSIDIYPFITL CALDIICETAMGVPVDAQLKENSQYVKN  
VKLMCKIGVLRSTSILKHNDFFYPLTLDYYREQKAVKQLHEVTNSVIESR  
MKHLESSGGKV KENTDELGRKKKLAFLDILLQSTVDGKPLSIEDIREEVD  
TFMFEGHDTTASAMTFTS FLLAGHPEVQARALEEQKS VFADDLLRPATY  
KDLMEMKYLECVIKESLRIYPSVPLYGRHTHEDEVNYKGNVIPKGTDTITIF  
DYGILHDPEIYPDPEKFDPSRFEEIDGKRPFNYIPFSAGPRNCIGQKFAMW  
EMKCTLSKILRNFELRPAIPKHTLKLTP EAVLKSSNGVRIQVRPRKL

CYP4BN WDSYKFLNNWL GKGLLTV EGSKWKKS RKL LTPAFHFSIVDQFVEVFDN  
NANILVGLLEKEQESDFVDVFPYITMYTLDNICEATMGVSINAQTDTQSE  
YVFAVKEMCRITVDRFTFSPIKMFNTLYPLTADYYK

CYP4G29 MSAATASVDLENPTTLLTPKNIFYLLIPALVLWYAYWKISRRHMVELAS  
KIPGPEGLPLLGSALFVGT SADIFKRM YAKSFEYGNTVKVWIGPKLLIFL  
VDPRDVEIILSSHVHIDKASEYRFFQPWLG DGLLISTGQK WRAHRKLIAPT  
FHLNVLKSFIDL FNANSREV VQKLKKEVGKEFDCHDYMSEATVEILLET  
AMGVSKKTQDQSGYDYAMAVM KMC DILHLRHTK VWLRPDFIFNL TN Y  
AKKQEGLIGIIHSLTRKVIKRKRADFEKGIRGSTAEVPEELKTKNFDKNVS  
SKTVVEGLSYGQAAGLKDDLDVDDD VGEKKRMAFLDLMIEASQNGVVI  
NDEEIKEQVDTIMFEGHDTTAAAGSSFFLSMMGVHQDIQDKVVQEIDEIFG  
DSDRPATFADTLEMKYLERCLMETLRMYPPVPIIARQLRQDVKLASGDY  
TLPAGATIVIGTFKIHRQEDVYPNPKFDPDNFLPERSANRHYYSFIPFSA  
GPRSCVGRKYAMLKLLKILLSTILRNYRIYSTVEEKDFQLQGDII LKRADGF  
RIKLEPRKRVLKA

CYP4G34 FSAGPRSCVGRKYAMLKLLK VLLAGVLRKFQIHCSETEEDFKLQADIILKK  
TGGFNISVTERKH

CYP4G<sup>a</sup> WFVSKCETRMSEQVVISM EGESYSFVSSAITFILCLTAILTA YHYWFKNL  
RHVKLTDNIPSPRTLPI LGHIHMIGIKSPTDVYDLVYDLYHKLNSDIVKL  
YFGPKLYIGICSAEDAELILGSSVHLEKPQEYRLFEPWLG DGLLISKGEKW  
RSHRKMIAPTFH TSILKSFMPVF NKNANNLVEQF

CYP4G<sup>b</sup> SKEKEDYMARKKSGETS LYMRAVKTGDYEDNQGSQDIMTNYIKDDLDE  
NDDNDVGEKKRLAFLDFMIEASQTGNNITDEEIKEEVDTIMFEGHDTTAA  
GSSFALCLLGIHQDIQQKVYEELKDIFQDNMDRPITFADTINMKYLERVIL  
ETLRLYPPVPLIG

CYP4Q10 MMKVTIAMRSKLLALLDLLNAKMNSGDIDDEGIRDEVNTFMFEGFDT  
TSTSICFTLMVLANYKNWQELAYQEIIQVLGDSKKEPSIHDLNEMKILERI  
IKESRLYPSVPFIARILEEDTMVCSRVIPKGV PINIHIYDIHRDPKHWPDPPE  
KFDPPDRFLTDNCVNRHPFAFV PFSAGPRNCIGQKFAMLELKT VYCGILRN  
FILEPVD

---



---

|                    |                                                                                                                                                                                                                                                                    |
|--------------------|--------------------------------------------------------------------------------------------------------------------------------------------------------------------------------------------------------------------------------------------------------------------|
| CYP4Q11            | GPRNCIGQKFAMLEIKAVLCGILRNFALEPQDTPDTIKIVPDLVLRRTTDGK<br>IRVKFRSRQ                                                                                                                                                                                                  |
| CYP4Q <sup>a</sup> | PAETFTMFFFSVLVITAGCVTIYFLVKYLGEYLRCVEMMRKLPKPTVPI<br>LGNTLDFVCDEVITIFLKIRNWCRTYGPVFRNLNMFYPSVNIAGAEQFEVI<br>ASSMKNIRKPMVYSFLNRWLGEGLLTSTGSKWHTRRRILTPAFHFSILQQ<br>FVGIFNSETERLVQILKKETEHS                                                                          |
| CYP4Q <sup>b</sup> | NVYSKFSVVVAGCVILFFLVRGFIEHLRTLKILKGLPGPEPIPVLKNVLEFL<br>GDDITLFRKVRYWARTYGPIYRIDMTSLYPGVNITGAEFEAIAAGPMKHI<br>QKAPIYFFLNRWLGEGLLTSTGSKWQTRRKNLDTSLSFQYFAAICWSFQ                                                                                                    |
| CYP4Q <sup>c</sup> | PWTDVIPLISQFTLFTIAETSMGIKLNMENREHREYVESINKLGPLIFHRL<br>RPWLHNNFLYYHAFVNGFKERKLINTIHRFTDSIIAEKLNKFKFEKGDG<br>EYDFSQRKKLALLDLLNAKLGEGIIDDEGIRDEVNTFMFEGYDTTSTAI<br>CFILMLLSIHKNWQDLVHEEILQVLGDSTEDPSLNDLNDLKIMERVVKEC<br>LRLYPSVPPFIGRLLLEEDTMINGFLIPKQTLMHVHILISIGI |
| CYP4 <sup>a</sup>  | RWFDSVYVRTMDSKVALEWSFLPPILFGIAITIFTYVWFSRREYLKIEW<br>VEEVPGLPFLGCILNLSKSTEILNVFSNYCRQYNGLARLNLFGKRFLVSD<br>YKFLEFVLNSNEILDKNDSYKF                                                                                                                                  |
| CYP4 <sup>b</sup>  | RSLMMFLLWELFILVMVFLSFPVYHYSKRNSKYLRNLPGPKPNMFVGN<br>WIDFFGTTEEFLSTLMLYLEKYGPHIKVYNGPISTAVVSADEKFIFFLSSP<br>KLIDKADEYSFLHNWLGLGLLTSTGLKW                                                                                                                            |
| CYP4 <sup>c</sup>  | NPAVDMLLEICFGVAIACIITLSFSNYVDCIRFSRLLSKLPGPKPLPVIGNI<br>LELACERELFFRKIRKWSQEYAPMYILSAFKSPA VNVSGAETFEVIA                                                                                                                                                           |
| CYP4 <sup>d</sup>  | TRIISYFPQREAMFSFMFFIVLCICLVSIFILYRGHTYLRKIPKPCNFILGHI<br>PDFIDRTKILEKLTKY SIECDGLMRIYFPPTKPAILIAKPSDVRTLSSGAAT<br>KKSIFYDYMKVWLGDGLVTRDEGETWRTRRKL                                                                                                                 |
| CYP4 <sup>e</sup>  | KRYAMLVLKNTISRIIEFELLPVPDHKLELGMALVLKSKYGLPIRFKPRP<br>KIEKDYCLMRKHSEKQINV                                                                                                                                                                                          |
| CYP349B            | QVLPGEIAKRHPCSYPFSYGPRNCIGPRYAMMAMKSLLCVLRKYKIFT<br>SYENVEDVKLKANSVLRPKDGYKVSVELRNI                                                                                                                                                                                |
| CYP349C1           | SIERLPFLNLMLKDPSFTMEEVIAEAKTFCLAGSETNASSTCFLNLLGLY<br>PEVQQKVYEEIIDILGPDR TILASDLPQMKYTERVIKENLRLFPVATIFGRE<br>IGEDIDLGNAILPKGSSVYFTAHYIHRNPKYWTNPLKFD PDRFLPDEIAKR<br>HPCTFIPFLYGPRNCLGWKYALLNMKIIIA                                                              |
| CYP350D1           | PFSAGPRNCIGWKYAIANMKTIIATVIRQFKIYTEYKSVEEIEINLYLLMR<br>MRDGPKVWLENR                                                                                                                                                                                                |
| CYP350D2           | IIREFKIFTEYKSIEEIEVKLYMLSCLKDRSKFWLELRQ                                                                                                                                                                                                                            |
| CYP350D4           | VVREFKIFTEYKSIEEME VVFHFTIQLKNGPKVWLERRR                                                                                                                                                                                                                           |

---

---

CYP411?

CVKDVLRRLFPIAPFMLRKVTEDYKLDKWILPKGATVAITAHYFHMNNAF  
WENPKHFHPDHFLPEAVGKRHIYSYLPFSAGPRGCIGKTFANISIKTFLIHL  
LQRFEIEADGKVPDIALMSDISVRPKKGFNVRLKRVWS

CYP421A1

MIALFSLVGVVLPFLYWYYVVYVKFRSFRALPGPKPIIGSKIANDSVG  
ILVDMQNLERYKPTFVIYTGQVRVVHSKPEHIHYIVTSNAHTTKSDNF  
DVLKGWIGELATSKGDKWRERRKMINQSFNMNLMERFMQVFNSASD  
ALVKNLEKESGKDCTDILNYTNFSALEIACENLMGIKLPENAAEEYI  
EKTVMRLRIVGVRRFFSWQRFETIFLMFSKHSKIYLDYVGTLLKFTLDVI  
ERRSKTF

---

Table S3. Statistical analyses of five candidate reference genes based on their threshold cycle ( $C_T$ ) value.

| <i>BestKeeper analyses of candidate reference genes (n=5)</i> |             |             |             |             |              |                   |
|---------------------------------------------------------------|-------------|-------------|-------------|-------------|--------------|-------------------|
| Parameter                                                     | <i>RpL4</i> | <i>Rp18</i> | <i>Ef1a</i> | <i>NADH</i> | <i>HSP70</i> | <i>BestKeeper</i> |
| N                                                             | 72          | 72          | 72          | 72          | 72           | 72                |
| GM [ $C_T$ ]                                                  | 17.10       | 16.85       | 13.41       | 14.12       | 14.91        | 15.21             |
| AM [ $C_T$ ]                                                  | 17.12       | 16.87       | 13.43       | 14.14       | 14.93        | 15.22             |
| Min [ $C_T$ ]                                                 | 15.20       | 15.05       | 11.48       | 12.65       | 13.04        | 13.51             |
| Max [ $C_T$ ]                                                 | 19.07       | 18.86       | 15.54       | 15.51       | 17.38        | 17.19             |
| SD [ $\pm C_T$ ]                                              | 0.54        | 0.50        | 0.60        | 0.52        | 0.59         | 0.51              |
| CV [% $C_T$ ]                                                 | 3.15        | 2.96        | 4.45        | 3.67        | 3.98         | 3.33              |
| <i>Pair-wise correlation analyses</i>                         |             |             |             |             |              |                   |
| <i>BestKeeper</i> vs                                          | <i>RpL4</i> | <i>Rp18</i> | <i>Ef1a</i> | <i>NADH</i> | <i>HSP70</i> |                   |
| Coeff. of corr. [ $r$ ]                                       | 0.973       | 0.965       | 0.968       | 0.811       | 0.960        |                   |
| Coeff. of det. [ $r^2$ ]                                      | 0.947       | 0.931       | 0.937       | 0.658       | 0.922        |                   |
| $P$ -value                                                    | 0.001       | 0.001       | 0.001       | 0.001       | 0.001        |                   |

Abbreviations for listed parameters: n: number of candidate reference genes; N: sample size for each candidate reference genes as well as the *BestKeeper*; GM [ $C_T$ ]: geometric means of the threshold cycle ( $C_T$ ); AM [ $C_T$ ]: the arithmetic mean of  $C_T$ ; Min [ $C_T$ ] and Max [ $C_T$ ]: the extreme values of  $C_T$ ; SD [ $\pm C_T$ ]: the standard deviation of the  $C_T$ ; CV [%  $C_T$ ]: the coefficient of variance expressed as a percentage at the  $C_T$  level; The correlation between each candidate reference gene and *BestKeeper* index is calculated by the Pearson correlation coefficient [ $r$ ], coefficient of determination [ $r^2$ ], and the  $P$ -value.

Table S4. Differential expression of 76 CPB P450s in imidacloprid resistant and susceptible strains.

| <b>Primer No.</b> | <b>Gene Name</b>    | <b>Fold<sup>a)</sup></b> | <b>p-value</b> | <b>Differential expression<sup>b)</sup></b> |
|-------------------|---------------------|--------------------------|----------------|---------------------------------------------|
| Ld85              | CYP6BH              | 3.31                     | 0.00           | UP                                          |
| Ld30              | CYP6BJ1             | 1.34                     | 0.01           |                                             |
| Ld113             | CYP6BJ3             | 1.54                     | 0.09           |                                             |
| Ld15              | CYP6BJ <sup>a</sup> | 1.97                     | 0.00           |                                             |
| Ld84              | CYP6BJ <sup>b</sup> | 1.44                     | 0.01           |                                             |
| Ld106             | CYP6BK              | 1.62                     | 0.01           |                                             |
| Ld154             | CYP6BQ15            | 1.38                     | 0.01           |                                             |
| Ld143             | CYP6BQ16            | 1.99                     | 0.00           |                                             |
| Ld27              | CYP6BQ21            | 2.71                     | 0.00           | UP                                          |
| Ld148             | CYP6BQ22            | 1.48                     | 0.03           |                                             |
| Ld161             | CYP6BQ              | 1.96                     | 0.03           |                                             |
| Ld45              | CYP6BU <sup>a</sup> | 1.51                     | 0.05           |                                             |
| Ld157             | CYP6BU <sup>b</sup> | 1.20                     | 0.07           |                                             |
| Ld2               | CYP6ED1v2           | 1.46                     | 0.02           |                                             |
| Ld104             | CYP6ED              | 0.94                     | 0.43           |                                             |
| Ld5               | CYP6EE1v2           | 1.82                     | 0.00           |                                             |
| Ld78              | CYP6EE1             | 1.78                     | 0.01           |                                             |
| Ld12              | CYP6EF1             | 1.62                     | 0.01           |                                             |
| Ld80              | CYP6EG1             | 1.08                     | 0.30           |                                             |
| Ld6               | CYP6EH1             | 7.26                     | 0.00           | UP                                          |
| Ld115             | CYP6EZ1             | 7.20                     | 0.00           | UP                                          |
| Ld93              | CYP6FA1             | 8.29                     | 0.01           | UP                                          |
| Ld101             | CYP6                | 4.19                     | 0.00           | UP                                          |
| Ld126             | CYP9A               | 9.29                     | 0.00           | UP                                          |
| Ld13              | CYP9AV1             | 0.94                     | 0.36           |                                             |
| Ld29              | CYP9V1v1            | 3.22                     | 0.00           | UP                                          |
| Ld25              | CYP9V1v2            | 2.75                     | 0.00           | UP                                          |
| Ld41              | CYP9V2v2            | 2.70                     | 0.00           | UP                                          |
| Ld83              | CYP9Y <sup>a</sup>  | 15.19                    | 0.00           | UP                                          |
| Ld114             | CYP9Y <sup>b</sup>  | 7.45                     | 0.00           | UP                                          |
| Ld117             | CYP9Y <sup>c</sup>  | 10.13                    | 0.00           | UP                                          |
| Ld42              | CYP9Z13             | 2.63                     | 0.00           | UP                                          |
| Ld63              | CYP9Z14v1           | 7.25                     | 0.00           | UP                                          |
| Ld38              | CYP9Z25             | 16.64                    | 0.00           | UP                                          |
| Ld3               | CYP9Z26             | 1372.95                  | 0.00           | UP                                          |
| Ld68              | CYP9Z28             | 8.40                     | 0.00           | UP                                          |

---

|       |                    |       |      |      |
|-------|--------------------|-------|------|------|
| Ld147 | CYP9Z29            | 7.55  | 0.00 | UP   |
| Ld39  | CYP9Z30            | 0.20  | 0.00 | DOWN |
| Ld134 | CYP9Z31            | 0.30  | 0.00 | DOWN |
| Ld152 | CYP9Z <sup>a</sup> | 0.92  | 0.32 |      |
| Ld140 | CYP9Z <sup>b</sup> | 1.61  | 0.00 |      |
| Ld40  | CYP9Z <sup>c</sup> | 3.89  | 0.00 | UP   |
| Ld37  | CYP9Z <sup>d</sup> | 10.18 | 0.00 | UP   |
| Ld121 | CYP9Z <sup>e</sup> | 1.79  | 0.00 |      |
| Ld43  | CYP9Z <sup>f</sup> | 2.80  | 0.00 | UP   |
| Ld158 | CYP9Z <sup>g</sup> | 4.01  | 0.00 | UP   |
| Ld156 | CYP9Z <sup>h</sup> | 0.88  | 0.24 |      |
| Ld1   | CYP9Z <sup>i</sup> | 5.26  | 0.00 | UP   |
| Ld155 | CYP9Z <sup>j</sup> | 5.59  | 0.00 | UP   |
| Ld150 | CYP9Z <sup>k</sup> | 5.15  | 0.00 | UP   |
| Ld97  | CYP9Z <sup>l</sup> | 1.62  | 0.01 |      |
| Ld159 | CYP9Z <sup>m</sup> | 4.74  | 0.00 | UP   |
| Ld160 | CYP9Z <sup>n</sup> | 2.11  | 0.00 | UP   |
| Ld21  | CYP9Z <sup>o</sup> | 1.04  | 0.42 |      |
| Ld109 | CYP9               | 1.54  | 0.04 |      |
| Ld131 | CYP4AA1            | 4.83  | 0.01 | UP   |
| Ld50  | CYP4BN12v2         | 1.38  | 0.11 |      |
| Ld118 | CYP4BN12v3         | 1.36  | 0.11 |      |
| Ld48  | CYP4BN13v4         | 6.20  | 0.00 | UP   |
| Ld49  | CYP4BN14v1         | 0.51  | 0.00 |      |
| Ld89  | CYP4BN15           | 4.26  | 0.01 | UP   |
| Ld153 | CYP4BN             | 0.55  | 0.01 |      |
| Ld32  | CYP4G29            | 3.27  | 0.00 | UP   |
| Ld127 | CYP4G34            | 2.13  | 0.00 | UP   |
| Ld81  | CYP4G <sup>a</sup> | 2.46  | 0.00 | UP   |
| Ld141 | CYP4G <sup>b</sup> | 2.43  | 0.00 | UP   |
| Ld125 | CYP4Q10            | 3.81  | 0.00 | UP   |
| Ld46  | CYP4Q11            | 3.97  | 0.01 | UP   |
| Ld22  | CYP4Q <sup>a</sup> | 1.11  | 0.18 |      |
| Ld166 | CYP4Q <sup>b</sup> | 6.27  | 0.00 | UP   |
| Ld119 | CYP4Q <sup>c</sup> | 4.56  | 0.02 | UP   |
| Ld138 | CYP4 <sup>a</sup>  | 0.50  | 0.00 |      |

---

---

|       |                   |       |      |    |
|-------|-------------------|-------|------|----|
| Ld133 | CYP4 <sup>b</sup> | 0.74  | 0.11 |    |
| Ld123 | CYP4 <sup>c</sup> | 6.61  | 0.00 | UP |
| Ld72  | CYP4 <sup>d</sup> | 0.97  | 0.45 |    |
| Ld107 | CYP4 <sup>e</sup> | 16.36 | 0.00 | UP |

---

a) Fold: the relative expression of P450 in the resistant strain divided by the expression in the susceptible strain; b) UP: Resistant/Susceptible > 2, p-value < 0.05; DOWN: Resistant/Susceptible < 0.5, p-value < 0.05.

Table S5. Induction of 76 CBP P450s by imidacloprid and potato leaf GAs in head, fat body and gut.

| 41 P450s were induced by both potato leaf GAs and imidacloprid in the resistant strain (fold>2, p-value<0.05) |                     |              |         |          |         |      |         |                 |         |          |         |       |         |
|---------------------------------------------------------------------------------------------------------------|---------------------|--------------|---------|----------|---------|------|---------|-----------------|---------|----------|---------|-------|---------|
| Primer No.                                                                                                    | Gene Name           | Imidacloprid |         |          |         |      |         | Potato leaf GAs |         |          |         |       |         |
|                                                                                                               |                     | Head         | p-value | Fat body | p-value | Gut  | p-value | Head            | p-value | Fat body | p-value | Gut   | p-value |
| Ld85                                                                                                          | CYP6BH              | 1.11         | 0.22    | 2.24     | 0.01    | 1.25 | 0.05    | 1.66            | 0.06    | 3.67     | 0.01    | 3.75  | 0.00    |
| Ld30                                                                                                          | CYP6BJ1             | 0.82         | 0.01    | 6.83     | 0.02    | 1.07 | 0.39    | 1.31            | 0.00    | 2.88     | 0.00    | 6.77  | 0.00    |
| Ld15                                                                                                          | CYP6BJ <sup>a</sup> | 0.97         | 0.40    | 7.48     | 0.02    | 1.17 | 0.27    | 1.99            | 0.00    | 2.63     | 0.01    | 7.10  | 0.00    |
| Ld84                                                                                                          | CYP6BJ <sup>b</sup> | 1.45         | 0.04    | 6.74     | 0.02    | 1.14 | 0.28    | 2.53            | 0.00    | 2.47     | 0.01    | 6.17  | 0.00    |
| Ld154                                                                                                         | CYP6BQ15            | 1.73         | 0.02    | 3.29     | 0.00    | 1.60 | 0.00    | 1.11            | 0.32    | 1.30     | 0.10    | 5.15  | 0.00    |
| Ld143                                                                                                         | CYP6BQ16            | 0.57         | 0.11    | 5.48     | 0.00    | 1.39 | 0.05    | 0.82            | 0.29    | 2.76     | 0.00    | 4.30  | 0.01    |
| Ld27                                                                                                          | CYP6BQ21            | 1.63         | 0.01    | 6.87     | 0.00    | 1.51 | 0.16    | 2.13            | 0.00    | 3.36     | 0.00    | 5.60  | 0.04    |
| Ld148                                                                                                         | CYP6BQ22            | 0.93         | 0.43    | 4.67     | 0.00    | 1.55 | 0.01    | 1.25            | 0.27    | 1.90     | 0.01    | 5.13  | 0.01    |
| Ld161                                                                                                         | CYP6BQ              | 0.97         | 0.43    | 5.10     | 0.00    | 1.78 | 0.00    | 1.40            | 0.04    | 2.45     | 0.00    | 4.94  | 0.00    |
| Ld45                                                                                                          | CYP6BU <sup>a</sup> | 0.79         | 0.25    | 4.63     | 0.00    | 1.52 | 0.00    | 1.27            | 0.26    | 2.01     | 0.01    | 4.92  | 0.00    |
| Ld157                                                                                                         | CYP6BU <sup>b</sup> | 1.17         | 0.21    | 4.79     | 0.00    | 1.69 | 0.02    | 2.04            | 0.01    | 2.09     | 0.00    | 6.23  | 0.01    |
| Ld2                                                                                                           | CYP6ED1v2           | 1.07         | 0.25    | 1.83     | 0.03    | 3.13 | 0.01    | 1.69            | 0.04    | 2.92     | 0.01    | 16.35 | 0.03    |
| Ld12                                                                                                          | CYP6EF1             | 0.81         | 0.08    | 2.44     | 0.00    | 1.31 | 0.02    | 0.87            | 0.21    | 1.99     | 0.00    | 3.22  | 0.00    |
| Ld115                                                                                                         | CYP6EZ1             | 1.40         | 0.01    | 2.01     | 0.04    | 1.42 | 0.05    | 0.45            | 0.00    | 1.69     | 0.02    | 4.70  | 0.04    |
| Ld126                                                                                                         | CYP9A               | 2.12         | 0.00    | 3.76     | 0.01    | 1.98 | 0.01    | 2.28            | 0.00    | 2.40     | 0.00    | 2.78  | 0.00    |
| Ld29                                                                                                          | CYP9V1v1            | 1.74         | 0.00    | 2.89     | 0.00    | 3.63 | 0.03    | 0.83            | 0.01    | 0.88     | 0.32    | 4.45  | 0.00    |
| Ld25                                                                                                          | CYP9V1v2            | 1.64         | 0.03    | 2.98     | 0.00    | 3.79 | 0.04    | 0.75            | 0.01    | 1.04     | 0.44    | 4.32  | 0.00    |
| Ld41                                                                                                          | CYP9V2v2            | 1.64         | 0.03    | 3.14     | 0.00    | 3.69 | 0.02    | 0.87            | 0.03    | 1.06     | 0.41    | 4.95  | 0.00    |
| Ld83                                                                                                          | CYP9Y <sup>a</sup>  | 2.55         | 0.00    | 4.00     | 0.01    | 2.05 | 0.00    | 3.50            | 0.00    | 2.51     | 0.00    | 3.12  | 0.00    |
| Ld114                                                                                                         | CYP9Y <sup>b</sup>  | 3.42         | 0.00    | 3.80     | 0.03    | 1.78 | 0.00    | 3.56            | 0.00    | 2.72     | 0.02    | 3.42  | 0.00    |
| Ld117                                                                                                         | CYP9Y <sup>c</sup>  | 2.46         | 0.00    | 2.19     | 0.00    | 2.50 | 0.00    | 2.40            | 0.00    | 1.88     | 0.00    | 1.28  | 0.01    |
| Ld38                                                                                                          | CYP9Z25             | 3.35         | 0.00    | 7.74     | 0.00    | 5.40 | 0.00    | 4.26            | 0.00    | 11.44    | 0.00    | 21.41 | 0.03    |
| Ld3                                                                                                           | CYP9Z26             | 4.72         | 0.00    | 24.29    | 0.00    | 6.34 | 0.00    | 5.76            | 0.00    | 10.73    | 0.00    | 10.09 | 0.00    |

| Ld147                                                                                                   | CYP9Z29            | 1.89         | 0.00    | 9.79     | 0.00    | 1.83 | 0.00    | 2.34            | 0.00    | 7.35     | 0.00    | 8.51  | 0.00    |
|---------------------------------------------------------------------------------------------------------|--------------------|--------------|---------|----------|---------|------|---------|-----------------|---------|----------|---------|-------|---------|
| Ld152                                                                                                   | CYP9Z <sup>a</sup> | 0.23         | 0.07    | 5.19     | 0.00    | 0.84 | 0.10    | 0.31            | 0.09    | 3.90     | 0.00    | 5.35  | 0.00    |
| Ld140                                                                                                   | CYP9Z <sup>b</sup> | 1.39         | 0.06    | 4.01     | 0.00    | 3.01 | 0.00    | 1.90            | 0.04    | 1.94     | 0.02    | 3.71  | 0.00    |
| Ld40                                                                                                    | CYP9Z <sup>c</sup> | 2.31         | 0.00    | 4.70     | 0.01    | 3.13 | 0.00    | 1.61            | 0.12    | 0.71     | 0.07    | 7.53  | 0.00    |
| Ld37                                                                                                    | CYP9Z <sup>d</sup> | 2.73         | 0.00    | 13.48    | 0.00    | 3.53 | 0.00    | 3.51            | 0.00    | 5.33     | 0.00    | 6.00  | 0.00    |
| Ld121                                                                                                   | CYP9Z <sup>f</sup> | 0.81         | 0.12    | 2.22     | 0.00    | 1.43 | 0.05    | 1.06            | 0.01    | 1.58     | 0.16    | 2.65  | 0.00    |
| Ld43                                                                                                    | CYP9Z <sup>e</sup> | 0.76         | 0.25    | 2.82     | 0.02    | 1.96 | 0.01    | 1.32            | 0.23    | 0.64     | 0.21    | 3.10  | 0.00    |
| Ld158                                                                                                   | CYP9Z <sup>g</sup> | 1.98         | 0.00    | 9.25     | 0.00    | 1.80 | 0.00    | 1.55            | 0.02    | 4.50     | 0.00    | 7.48  | 0.00    |
| Ld150                                                                                                   | CYP9Z <sup>k</sup> | 2.09         | 0.00    | 4.04     | 0.00    | 2.60 | 0.00    | 1.23            | 0.05    | 0.75     | 0.22    | 7.12  | 0.00    |
| Ld97                                                                                                    | CYP9Z <sup>l</sup> | 1.81         | 0.02    | 4.35     | 0.00    | 3.41 | 0.00    | 1.91            | 0.00    | 2.78     | 0.00    | 4.80  | 0.00    |
| Ld159                                                                                                   | CYP9Z <sup>m</sup> | 1.84         | 0.00    | 4.79     | 0.00    | 2.67 | 0.00    | 1.10            | 0.23    | 0.91     | 0.48    | 7.85  | 0.00    |
| Ld160                                                                                                   | CYP9Z <sup>n</sup> | 1.13         | 0.13    | 2.27     | 0.00    | 1.51 | 0.02    | 1.19            | 0.10    | 1.48     | 0.15    | 2.16  | 0.00    |
| Ld109                                                                                                   | CYP9               | 1.01         | 0.49    | 1.83     | 0.04    | 2.33 | 0.01    | 1.57            | 0.03    | 2.55     | 0.01    | 11.99 | 0.04    |
| Ld50                                                                                                    | CYP4BN12v2         | 1.39         | 0.05    | 2.19     | 0.00    | 1.65 | 0.05    | 2.01            | 0.00    | 3.59     | 0.00    | 6.82  | 0.01    |
| Ld32                                                                                                    | CYP4G29            | 0.90         | 0.00    | 2.13     | 0.02    | 2.52 | 0.01    | 1.09            | 0.38    | 2.16     | 0.02    | 1.50  | 0.18    |
| Ld22                                                                                                    | CYP4Q <sup>a</sup> | 0.80         | 0.01    | 0.78     | 0.04    | 3.00 | 0.00    | 0.54            | 0.00    | 0.47     | 0.00    | 3.61  | 0.03    |
| Ld166                                                                                                   | CYP4Q <sup>b</sup> | 1.31         | 0.20    | 2.30     | 0.00    | 1.37 | 0.00    | 0.84            | 0.13    | 2.22     | 0.03    | 2.85  | 0.00    |
| Ld133                                                                                                   | CYP4 <sup>b</sup>  | 0.81         | 0.33    | 2.30     | 0.01    | 2.05 | 0.05    | 1.06            | 0.44    | 3.24     | 0.02    | 7.56  | 0.01    |
| <b>13 P450s were induced by imidacloprid alone in the resistant strain (fold&gt;2, p-value&lt;0.05)</b> |                    |              |         |          |         |      |         |                 |         |          |         |       |         |
| Primer No.                                                                                              | Gene Name          | Imidacloprid |         |          |         |      |         | Potato leaf GAs |         |          |         |       |         |
|                                                                                                         |                    | Head         | p-value | Fat body | p-value | Gut  | p-value | Head            | p-value | Fat body | p-value | Gut   | p-value |
| Ld13                                                                                                    | CYP9AV1            | 0.39         | 0.06    | 4.59     | 0.01    | 0.29 | 0.11    | 0.75            | 0.29    | 1.11     | 0.29    | 0.02  | 0.04    |
| Ld42                                                                                                    | CYP9Z13            | 1.38         | 0.08    | 2.53     | 0.00    | 0.61 | 0.00    | 1.15            | 0.07    | 1.42     | 0.10    | 2.30  | 0.39    |
| Ld63                                                                                                    | CYP9Z14v1          | 1.40         | 0.02    | 4.79     | 0.00    | 2.11 | 0.00    | 1.31            | 0.00    | 1.72     | 0.02    | 1.18  | 0.02    |
| Ld68                                                                                                    | CYP9Z28            | 1.48         | 0.02    | 4.82     | 0.00    | 4.82 | 0.00    | 1.32            | 0.03    | 1.60     | 0.02    | 1.60  | 0.02    |
| Ld156                                                                                                   | CYP9Z <sup>h</sup> | 0.38         | 0.06    | 4.47     | 0.00    | 0.33 | 0.12    | 0.61            | 0.19    | 1.10     | 0.29    | 0.02  | 0.04    |
| Ld1                                                                                                     | CYP9Z <sup>i</sup> | 1.49         | 0.00    | 2.49     | 0.00    | 1.96 | 0.00    | 1.56            | 0.02    | 1.06     | 0.40    | 1.01  | 0.48    |



| Ld155                                                                                                      | CYP9Z <sup>j</sup> | 1.19         | 0.02    | 2.23     | 0.00    | 1.93 | 0.00    | 0.96            | 0.27    | 0.83     | 0.08    | 0.96 | 0.39    |
|------------------------------------------------------------------------------------------------------------|--------------------|--------------|---------|----------|---------|------|---------|-----------------|---------|----------|---------|------|---------|
| Ld21                                                                                                       | CYP9Z <sup>o</sup> | 0.62         | 0.14    | 3.78     | 0.00    | 0.33 | 0.11    | 1.20            | 0.30    | 0.85     | 0.20    | 0.03 | 0.04    |
| Ld131                                                                                                      | CYP4AA1            | 1.24         | 0.05    | 2.67     | 0.00    | 0.01 | 0.00    | 1.81            | 0.00    | 0.78     | 0.00    | 0.01 | 0.00    |
| Ld127                                                                                                      | CYP4G34            | 0.92         | 0.17    | 2.38     | 0.02    | 2.12 | 0.01    | 0.83            | 0.17    | 1.79     | 0.07    | 0.38 | 0.00    |
| Ld81                                                                                                       | CYP4G <sup>a</sup> | 1.10         | 0.13    | 2.38     | 0.02    | 3.24 | 0.01    | 0.95            | 0.41    | 1.59     | 0.11    | 0.59 | 0.18    |
| Ld141                                                                                                      | CYP4G <sup>b</sup> | 0.87         | 0.03    | 2.35     | 0.02    | 1.66 | 0.04    | 0.79            | 0.10    | 1.70     | 0.08    | 0.34 | 0.00    |
| Ld125                                                                                                      | CYP4Q10            | 0.96         | 0.42    | 2.64     | 0.00    | 1.22 | 0.00    | 0.63            | 0.05    | 1.25     | 0.00    | 1.80 | 0.00    |
| <b>17 P450s were induced by potato leaf GAs alone in the resistant strain (fold&gt;2, p-value&lt;0.05)</b> |                    |              |         |          |         |      |         |                 |         |          |         |      |         |
| Primer No.                                                                                                 | Gene Name          | Imidacloprid |         |          |         |      |         | Potato leaf GAs |         |          |         |      |         |
|                                                                                                            |                    | Head         | p-value | Fat body | p-value | Gut  | p-value | Head            | p-value | Fat body | p-value | Gut  | p-value |
| Ld113                                                                                                      | CYP6BJ3            | 1.29         | 0.17    | 1.68     | 0.02    | 1.20 | 0.14    | 0.87            | 0.10    | 2.17     | 0.00    | 7.47 | 0.00    |
| Ld106                                                                                                      | CYP6BK             | 0.27         | 0.09    | 1.96     | 0.00    | 1.49 | 0.00    | 0.23            | 0.08    | 0.64     | 0.03    | 2.05 | 0.00    |
| Ld104                                                                                                      | CYP6ED             | 3.25         | 0.07    | 6.54     | 0.06    | 8.23 | 0.05    | 5.74            | 0.01    | 7.90     | 0.00    | 5.10 | 0.03    |
| Ld78                                                                                                       | CYP6EE1            | 0.87         | 0.26    | 1.83     | 0.04    | 1.20 | 0.17    | 0.92            | 0.28    | 2.99     | 0.07    | 2.06 | 0.00    |
| Ld93                                                                                                       | CYP6FA1            | 0.76         | 0.25    | 0.34     | 0.12    | 2.17 | 0.06    | 1.32            | 0.01    | 0.32     | 0.11    | 4.69 | 0.00    |
| Ld101                                                                                                      | CYP6               | 0.92         | 0.38    | 0.29     | 0.10    | 1.96 | 0.02    | 1.33            | 0.05    | 0.38     | 0.13    | 4.60 | 0.00    |
| Ld118                                                                                                      | CYP4BN12v3         | 1.90         | 0.00    | 1.61     | 0.03    | 1.94 | 0.04    | 1.73            | 0.00    | 2.36     | 0.01    | 7.03 | 0.01    |
| Ld48                                                                                                       | CYP4BN13v4         | 0.57         | 0.02    | 0.92     | 0.42    | 0.76 | 0.23    | 1.27            | 0.07    | 1.29     | 0.34    | 3.28 | 0.00    |
| Ld49                                                                                                       | CYP4BN14v1         | 0.92         | 0.00    | 0.36     | 0.00    | 1.67 | 0.00    | 1.33            | 0.03    | 0.63     | 0.00    | 2.76 | 0.00    |
| Ld89                                                                                                       | CYP4BN15           | 0.75         | 0.10    | 1.26     | 0.10    | 1.80 | 0.01    | 0.80            | 0.13    | 1.35     | 0.06    | 4.99 | 0.00    |
| Ld153                                                                                                      | CYP4BN             | 1.32         | 0.01    | 0.37     | 0.00    | 1.52 | 0.00    | 0.82            | 0.05    | 0.35     | 0.01    | 3.57 | 0.00    |
| Ld46                                                                                                       | CYP4Q11            | 0.77         | 0.17    | 1.88     | 0.00    | 1.28 | 0.00    | 0.63            | 0.06    | 1.28     | 0.02    | 4.24 | 0.00    |
| Ld119                                                                                                      | CYP4Q <sup>c</sup> | 0.99         | 0.48    | 1.55     | 0.01    | 1.23 | 0.02    | 0.52            | 0.03    | 1.16     | 0.05    | 3.85 | 0.00    |
| Ld138                                                                                                      | CYP4 <sup>a</sup>  | 0.98         | 0.47    | 0.36     | 0.00    | 1.50 | 0.00    | 0.67            | 0.14    | 0.33     | 0.02    | 3.44 | 0.00    |
| Ld123                                                                                                      | CYP4 <sup>c</sup>  | 0.59         | 0.12    | 1.52     | 0.00    | 1.13 | 0.06    | 0.51            | 0.05    | 1.21     | 0.23    | 4.08 | 0.00    |
| Ld72                                                                                                       | CYP4 <sup>d</sup>  | 0.33         | 0.07    | 0.75     | 0.17    | 1.12 | 0.25    | 0.50            | 0.14    | 0.61     | 0.09    | 4.50 | 0.00    |
| Ld107                                                                                                      | CYP4 <sup>e</sup>  | 0.77         | 0.21    | 1.43     | 0.19    | 1.55 | 0.01    | 6.27            | 0.03    | 8.88     | 0.00    | 9.71 | 0.00    |

**5 P450s were not induced by imidacloprid or potato leaf GAs in the resistant strain**

| Primer No. | Gene Name | Imidacloprid |         |          |         |      |         | Potato leaf GAs |         |          |         |      |         |
|------------|-----------|--------------|---------|----------|---------|------|---------|-----------------|---------|----------|---------|------|---------|
|            |           | Head         | p-value | Fat body | p-value | Gut  | p-value | Head            | p-value | Fat body | p-value | Gut  | p-value |
| Ld5        | CYP6EE1v2 | 0.80         | 0.18    | 1.56     | 0.03    | 0.98 | 0.47    | 1.06            | 0.40    | 1.44     | 0.05    | 1.94 | 0.00    |
| Ld80       | CYP6EG1   | 0.18         | 0.07    | 1.32     | 0.29    | 1.30 | 0.00    | 0.10            | 0.06    | 0.21     | 0.02    | 1.83 | 0.00    |
| Ld6        | CYP6EH1   | 0.89         | 0.24    | 1.94     | 0.06    | 1.63 | 0.00    | 0.39            | 0.00    | 1.51     | 0.07    | 4.34 | 0.05    |
| Ld39       | CYP9Z30   | 0.61         | 0.00    | 0.70     | 0.09    | 1.04 | 0.45    | 1.02            | 0.44    | 0.76     | 0.17    | 1.62 | 0.01    |
| Ld134      | CYP9Z31   | 0.65         | 0.00    | 0.73     | 0.12    | 0.96 | 0.44    | 0.97            | 0.44    | 0.64     | 0.11    | 1.52 | 0.05    |

Table S6. Insect P450s selected for phylogenetic tree construction.

| <b>Insect species</b>          | <b>P450 name</b> | <b>Access number</b> | <b>Length (aa)</b> | <b>Reference</b>                                                        |
|--------------------------------|------------------|----------------------|--------------------|-------------------------------------------------------------------------|
| <i>Apis mellifera</i>          | CYP9Q1           | ---                  | 510                | Mao et al. 2011 <sup>66</sup>                                           |
| <i>Apis mellifera</i>          | CYP9Q2           | ---                  | 532                | Mao et al. 2011 <sup>66</sup>                                           |
| <i>Apis mellifera</i>          | CYP9Q3           | ---                  | 517                | Mao et al. 2011 <sup>66</sup>                                           |
| <i>Bemisia tabaci</i>          | CYP6CM1vQ        | ACA51846             | 521                | Karunker et al. 2008 <sup>33</sup>                                      |
| <i>Bemisia tabaci</i>          | CYP6CM1vB        | ACD84797             | 520                | Karunker et al. 2008 <sup>33</sup>                                      |
| <i>Drosophila melanogaster</i> | CYP6g1           | AAL89788             | 524                | Daborn et al. 2002 <sup>29</sup> ;<br>Hoi et al. 2014 <sup>30</sup>     |
| <i>Helicoverpa armigera</i>    | CYP6AE11         | AID54887             | 522                | Tao et al. 2012 <sup>14</sup>                                           |
| <i>Helicoverpa armigera</i>    | CYP6AE14         | AKS48888             | 526                | Tao et al. 2012 <sup>14</sup>                                           |
| <i>Helicoverpa armigera</i>    | CYP6B7           | AKS48890             | 504                | Tao et al. 2012 <sup>14</sup>                                           |
| <i>Helicoverpa armigera</i>    | CYP9A14          | AKS48891             | 530                | Tao et al. 2012 <sup>14</sup>                                           |
| <i>Helicoverpa armigera</i>    | CYP9A17          | AAV28704             | 531                | Zhou et al. 2010 <sup>45</sup>                                          |
| <i>Helicoverpa armigera</i>    | CYP321A1         | AAM54724             | 499                | Tao et al. 2012 <sup>14</sup>                                           |
| <i>Meligethes aeneus</i>       | CYP6BQ23         | AGQ51764             | 522                | Zimmer et al. 2014 <sup>32</sup>                                        |
| <i>Musca domestica</i>         | CYP4D4v2         | ABV48807             | 505                | Zhu et al. 2008a <sup>21</sup>                                          |
| <i>Musca domestica</i>         | CYP4G2v1         | ABV48808             | 549                | Zhu et al. 2008a <sup>21</sup>                                          |
| <i>Musca domestica</i>         | CYP6A5v2         | ABV48810             | 507                | Zhu & Liu 2008 <sup>39</sup>                                            |
| <i>Musca domestica</i>         | CYP6A38v1        | ABV48809             | 500                | Zhu et al. 2008a <sup>21</sup>                                          |
| <i>Musca domestica</i>         | CYP6A36          | ABG34551             | 507                | Zhu et al. 2008b <sup>38</sup>                                          |
| <i>Musca domestica</i>         | CYP6D1           | AAA81513             | 516                | Tomita et al. 1995 <sup>28</sup>                                        |
| <i>Myzus persicae</i>          | CYP6CY3-S        | KF218356             | 511                | Puinean et al. 2010 <sup>34</sup>                                       |
| <i>Myzus persicae</i>          | CYP6CY3-R        | KF218350             | 511                | Puinean et al. 2010 <sup>34</sup>                                       |
| <i>Manduca sexta</i>           | CYP9A4           | AAD51036             | 522                | Stevens et al. 2000 <sup>43</sup>                                       |
| <i>Manduca sexta</i>           | CYP9A5           | AAD51038             | 520                | Stevens et al. 2000 <sup>43</sup>                                       |
| <i>Manduca sexta</i>           | CYP4M1           | ADE05575             | 504                | Snyder et al. 1995 <sup>25</sup> ;<br>Pauchet et al. 2010 <sup>44</sup> |
| <i>Manduca sexta</i>           | CYP4CG1          | ADE05577             | 500                | Snyder et al. 1995 <sup>25</sup> ;<br>Pauchet et al. 2010 <sup>44</sup> |
| <i>Nilaparvata lugens</i>      | CYP6AY1          | CAH65682             | 501                | Bao et al. 2015 <sup>37</sup> ; Ding et al. 2013 <sup>36</sup>          |
| <i>Nilaparvata lugens</i>      | CYP6ER1          | AEK01112             | 506                | Bao et al. 2015 <sup>37</sup> ; Bass et al. 2011 <sup>35</sup>          |
| <i>Papilio polyxenes</i>       | CYP6B1v1         | AAA29789             | 498                | Petersen et al. 2001 <sup>27</sup>                                      |
| <i>Papilio polyxenes</i>       | CYP6B3           | AAA96255             | 498                | Petersen et al. 2001 <sup>27</sup>                                      |
| <i>Tribolium castaneum</i>     | CYP6BQ9          | NP_001177722         | 521                | Zhu et al. 2010 <sup>26</sup> ; 2013 <sup>31</sup>                      |

Table S7. Primers used for qRT-PCR.

| Primer No. | Gene Name                 | Primer name                    | Sequence (5' to 3')                                         |
|------------|---------------------------|--------------------------------|-------------------------------------------------------------|
| Ld85       | <i>CYP6BH</i>             | qContig04303F<br>qContig04303R | GGTCACTCGAAGTCTTGTATACACCC<br>ACGAAGATGGGATGCAAGATCGGA      |
| Ld30       | <i>CYP6BJ1</i>            | qLdDQ117463F<br>qLdDQ117463R   | ACAGGCGATGGAAGTAGCTTGAC<br>TTGAACTCGTTTCGAATCCGGC           |
| Ld113      | <i>CYP6BJ3</i>            | qContig12558F<br>qContig12558R | TGAGACCATAGCAAAGTCCGGACT<br>TTACAGTCCAAGCCGAAAGCACAG        |
| Ld15       | <i>CYP6BJ<sup>a</sup></i> | qLdEB757598F<br>qLdEB757598R   | ACCGGTGGATTTGGAACATAATCA<br>CAGGTTCCCTCCATTTCTTTCCCTCC      |
| Ld84       | <i>CYP6BJ<sup>b</sup></i> | qContig10557F<br>qContig10557R | GGTTGAGATTCGGTGTGATGCAGT<br>TTCAGCCACATCCCTCCTTCTGTT        |
| Ld106      | <i>CYP6BK</i>             | qContig07056F<br>qContig07056R | TTGGAGATTACATCCACCAGCCCA<br>TGGATCGAACACCAGTGGATTAGG        |
| Ld154      | <i>CYP6BQ15</i>           | qContig08488F<br>qContig08488R | AGTCAAAGTGGGTCTCACTGCCA<br>AGTCAAAGTGGGTCTCACTGCCA          |
| Ld143      | <i>CYP6BQ16</i>           | qContig01265F<br>qContig01265R | TACTCGGCCATTCAAGATGCAGTG<br>AAAGCAACTGAACCAATCGCGTCCG       |
| Ld27       | <i>CYP6BQ21</i>           | qContig00220F<br>qContig00220R | GGGTGTGGAATACATCGAACCTGA<br>GGTCAATAGGAATGATAACTGGCG        |
| Ld148      | <i>CYP6BQ22</i>           | qContig01264F<br>qContig01264R | TCACACCGACCTTCACATCAGGAA<br>ATTGAACCAATCGCGTCTGTTGCG        |
| Ld161      | <i>CYP6BQ</i>             | qContig10876F<br>qContig10876R | AGACTCTTCGCAAACATTCAGCCG<br>CGATGGATCCCTGAAACGGGAATA        |
| Ld45       | <i>CYP6BU<sup>a</sup></i> | qContig09262F<br>qContig09262R | TGCATAGCGGCCAGATATGGACTT<br>ATCGAGCCAAACTCCTCCCTCAAT        |
| Ld157      | <i>CYP6BU<sup>b</sup></i> | qContig09308F<br>qContig09308R | ACCTAGAATGTGCATAGGAGCCAG<br>TTACGTTGAGCCAAACTCCTCCCT        |
| Ld2        | <i>CYP6ED1v2</i>          | qContig01354F<br>qContig01354R | TCAAACCTCATCTCTTCTGTTGGTATAGTC<br>CTCTGTAGTGATCCGTGAATTCCAA |
| Ld104      | <i>CYP6ED</i>             | qContig10723F<br>qContig10723R | CCGAGGAATTGTGTAGGTAACCGT<br>CGGCAATATCGTTGAGGAACTCAC        |
| Ld5        | <i>CYP6EE1v2</i>          | qContig01835F<br>qContig01835R | TCTCATGGTGCTACGGTCATTGGA<br>ATTCCAAGTGTGGACCTGAAAACC        |
| Ld78       | <i>CYP6EE1</i>            | qContig03888F<br>qContig03888R | CCAAGTTTGAAAAGGGAATGCGTG<br>ATCCAAACGGTGGTTCCCTTCTCA        |
| Ld12       | <i>CYP6EF1</i>            | qLdEB757657F<br>qLdEB757657R   | TCTCGGCACCTTCTCAATGGTGAT<br>TCCTGAACAAGGATGAGCTGTTGC        |
| Ld80       | <i>CYP6EG1</i>            | qContig02306F<br>qContig02306R | TACATTCACAGGCTGAGAGCCGTT<br>AGCGCTCACCTCTTATCCCTTGAT        |
| Ld6        | <i>CYP6EH1</i>            | qContig04994F<br>qContig04994R | TCAACATGTTTCGACCTATCGCCGT<br>ACCTCTCCGAAGCTTATCTTTCCG       |
| Ld115      | <i>CYP6EZ1</i>            | qContig01667F<br>qContig01667R | CCCGGAACAATTCAATCCTGAGAG<br>TAGGCCCAATTTGGTTTGCCACAG        |
| Ld93       | <i>CYP6FA1</i>            | qContig00754F<br>qContig00754R | ACGCTTCGGAATGGTACAGGTCAA<br>CCAAATACCTCCTTTAGCGCTTGC        |
| Ld101      | <i>CYP6</i>               | qContig07881F<br>qContig07881R | AAATGGATGGGATGTGGCAAACCG<br>ATCCTCCTCCGTGTCTCAAACCTT        |
| Ld126      | <i>CYP9A</i>              | qContig09946F<br>qContig09946R | CTACTGTGCCTTTGGCGTGCAAT<br>GTTGGCTTCGTCATTCTTGAACCC         |
| Ld13       | <i>CYP9AV1</i>            | qContig00465F<br>qContig00465R | AAATGACCTCGCCAGGTTTGATGG<br>AAGAGCGGATCAAGGTCATCGTGT        |
| Ld29       | <i>CYP9V1v1</i>           | qLdDQ117460F<br>qLdDQ117460R   | TCCGACCTTGATGATAAGAGACCC<br>TCTCTCCACCTTTGACCTGTCAGT        |

|       |                          |                                |                                                            |
|-------|--------------------------|--------------------------------|------------------------------------------------------------|
| Ld25  | <i>CYP9V1v2</i>          | qLdEB754758F<br>qLdEB754758R   | ACCATAGGGTCGTCATGCCTGAAA<br>TGCCTGTGAATGCTGGACTAAGGA       |
| Ld41  | <i>CYP9V2v2</i>          | qLdDQ631662F<br>qLdDQ631662R   | CCCGGAATTGTATTGGTTCAAGATTTGCC<br>CGAATTGAGGTTGAGCGTTGTCTGT |
| Ld83  | <i>CYP9Y<sup>a</sup></i> | qContig11158F<br>qContig11158R | TGGACCAAAGAGTACCCGAAGGAA<br>TCGACAATTCAGTCCGAGGTACGA       |
| Ld114 | <i>CYP9Y<sup>b</sup></i> | qContig12257F<br>qContig12257R | ACGTTACAAAGCTAGGAGACGGCA<br>CGGCCACACATATTCTGGTTAGCA       |
| Ld117 | <i>CYP9Y<sup>c</sup></i> | qContig09375F<br>qContig09375R | ATTTGGAAGTGGACCACGCAATTG<br>GCCAAATTCTTCTCGTCCAGCAAG       |
| Ld42  | <i>CYP9Z13</i>           | qLdDQ631659F<br>qLdDQ631659R   | GGAGGGCCCAAGGAAGTGTATT<br>TCCTAACCAAGAAACCACCTTCAGC        |
| Ld63  | <i>CYP9Z14v1</i>         | qContig01918F<br>qContig01918R | CACGGAATTGCATAGCGTTCGAGAT<br>AATCCAAGCCAGAAGCCTCCTTCA      |
| Ld38  | <i>CYP9Z25</i>           | qContig00260F<br>qContig00260R | ACTTGCACACCTTTGAGAGCATCC<br>TTGTCAACTTTCTCATGCCCACCC       |
| Ld3   | <i>CYP9Z26</i>           | qContig00493F<br>qContig00493R | AGTTCTGGTGGCTGCTGTATTAGC<br>GTTCTCCAGTTCTCTCAAATAGCC       |
| Ld68  | <i>CYP9Z28</i>           | qContig01161F<br>qContig01161R | ACCAATGTCTTACTGGAGAGAACGGG<br>ACTCCATAATACCTGGCACCTGGA     |
| Ld147 | <i>CYP9Z29</i>           | qContig01238F<br>qContig01238R | GAGCTGCTGCATTAGCCACCATTT<br>TCTTGTFTTGACACCTCTCTCTCCC      |
| Ld39  | <i>CYP9Z30</i>           | qContig03170F<br>qContig03170R | CGGCTCCAGATTTGCTTTGTTGGA<br>CACCTTCAACGGAAACAAGGATCG       |
| Ld134 | <i>CYP9Z31</i>           | qContig01532F<br>qContig01532R | AAAGCTGGACTCAATGTGGATCGC<br>AGACATGGACCCATTGTGGGCTAA       |
| Ld152 | <i>CYP9Z<sup>a</sup></i> | qContig06948F<br>qContig06948R | GGCACATTATTGATGATCCCTATGGTGGG<br>TATACAGAGTCTTGGTCCCAGTCCG |
| Ld140 | <i>CYP9Z<sup>b</sup></i> | qContig03035F<br>qContig03035R | TACCCAGAACCCTGCGTTTCGAT<br>GGTCCCGCACCAAATGGCATATAA        |
| Ld40  | <i>CYP9Z<sup>c</sup></i> | qContig08090F<br>qContig08090R | AGGGACCGAGGATATGTATAGGGT<br>CCTCTGCCGTTAGATTGAACGTCTT      |
| Ld37  | <i>CYP9Z<sup>d</sup></i> | qContig04061F<br>qContig04061R | TCAAATTCCTACTGAACTGTCTAGG<br>CCTCTCCACATCCTGAATAACTACTG    |
| Ld121 | <i>CYP9Z<sup>e</sup></i> | qContig08039F<br>qContig08039R | TGCCATTGTTCCAGTCGAGA<br>CGCTTCAATCCCAACCAGAAACCA           |
| Ld43  | <i>CYP9Z<sup>f</sup></i> | qLdDQ631658F<br>qLdDQ631658R   | CGATCCAGAAAGATTGAGCGACGA<br>GCCAAATCGTGATCCGATGCAGTT       |
| Ld158 | <i>CYP9Z<sup>g</sup></i> | qContig10068F<br>qContig10068R | GTTGGCTGTCCATCCAGACATTCA<br>TACTTCTCCTCCACATTCCGCCA        |
| Ld156 | <i>CYP9Z<sup>h</sup></i> | qContig09087F<br>qContig09087R | AAACGAAAGTGCCTCTGGAAGTC<br>GTCTAAACGTTTCAGTCCCTACCCA       |
| Ld1   | <i>CYP9Z<sup>i</sup></i> | qContig06620F<br>qContig06620R | ACGAGCCCATCATTTCTCAAGACG<br>GCTCTAGATTTCGCTCTCTTGAAGCA     |
| Ld155 | <i>CYP9Z<sup>j</sup></i> | qContig08801F<br>qContig08801R | ACTGGTTTGGTATTTGCGGCAGAC<br>TGGAACGTTGAGTTGACAAACGCC       |
| Ld150 | <i>CYP9Z<sup>k</sup></i> | qContig06091F<br>qContig06091R | AAGCTACTGGAGAGAACGAGGTG<br>GGTTGACCGGATTCATAGATCCCA        |
| Ld97  | <i>CYP9Z<sup>l</sup></i> | qContig08836F<br>qContig08836R | CCAGTAGTTCAACGGCTTAACGCA<br>TGATCAGTTGGCAGTGTCTCGAT        |
| Ld159 | <i>CYP9Z<sup>m</sup></i> | qContig10701F<br>qContig10701R | TACCTCTGCCTTTGGTGTGGAAGT<br>TCCTCCCAAATCAGTTGCCTCCT        |
| Ld160 | <i>CYP9Z<sup>n</sup></i> | qContig10810F<br>qContig10810R | TGGGAAAGAAGGCCACAGATCTC<br>ACACCCAGAACCTTGCTGATCCA         |
| Ld21  | <i>CYP9Z<sup>o</sup></i> | qLdEB755804F<br>qLdEB755804R   | AATGACCTCGCCAGGTTTGATGGT<br>TTGGTAAGAGCGGGTCAAGGTCAT       |

|                             |                          |                                                 |                                                                                  |
|-----------------------------|--------------------------|-------------------------------------------------|----------------------------------------------------------------------------------|
| Ld109                       | <i>CYP9</i>              | qContig11061F<br>qContig11061R                  | GCGCAGGTACCTTCCATTTGGTAT<br>AAACATGTTGATGGGCTCACAGCG                             |
| Ld131                       | <i>CYP4AA1</i>           | qContig07817F<br>qContig07817R                  | TCGTGGGCTTTATTACCCAGATGC<br>TTGTTGGCTTCCTCAGCAGTTGTG                             |
| Ld50                        | <i>CYP4BN12v2</i>        | qLdDQ631646F<br>qLdDQ631646R                    | CATCATCTCGAAAGTGCTGAGGCA<br>TGATCTCAGGAGCGAGCTTCAACT                             |
| Ld118                       | <i>CYP4BN12v3</i>        | qContig01477F<br>qContig01477R                  | TTGCAAGTCATCGGAGTCCCAACT<br>AATTCCTTGGTCTGCGCTAAAGG                              |
| Ld48                        | <i>CYP4BN13v4</i>        | qLdDQ631649F<br>qLdDQ631649R                    | GCATTGGTTGGTAATGAGGAGGCA<br>TGGAGTCGCTGGACGTAGTTCAA                              |
| Ld49                        | <i>CYP4BN14v1</i>        | qContig01451F<br>qContig01451R                  | GACCACGAAACTGCATAGGCCAAA<br>CTAAGATTGGCACATGACCGCAAG                             |
| Ld89                        | <i>CYP4BN15</i>          | qContig00384F<br>qContig00384R                  | AATGTCATGGCGGAAGCGGTAGTA<br>CATTTGGAAAGTTCGGGCGGGAAA                             |
| Ld153                       | <i>CYP4BN</i>            | qContig07821F<br>qContig07821R                  | CGTGTCATAAACGCTCAAACGGAC<br>TCTGTGACCGTGATTCTGCACAT                              |
| Ld32                        | <i>CYP4G29</i>           | qLdDQ117464F<br>qLdDQ117464R                    | TGGTACCTTCAAGATTCACCGCC<br>TGTTGGCACTACGTTCCGGTAAGA                              |
| Ld127                       | <i>CYP4G34</i>           | qContig09239F<br>qContig09239R                  | TGCTAGCAGGCGTTCTCCGTAAAT<br>GCTTCAATGCTTCTCTCAGTAACAG                            |
| Ld81                        | <i>CYP4G<sup>a</sup></i> | qContig02645F<br>qContig02645R                  | ATGGGCATCGGAAAGTCACCTACA<br>CATCTTCCGCACTGCAGATTCCAA                             |
| Ld141                       | <i>CYP4G<sup>b</sup></i> | qContig05926F<br>qContig05926R                  | TTCCAGGACAACATGGACAGACCT<br>ACTGGTGGATAGAGCCTCAGTGTT                             |
| Ld125                       | <i>CYP4Q10</i>           | qContig04050F<br>qContig04050R                  | CATACCCAAGGGCGTACCGATC<br>ATGCGAACGGATGCCTGTTGAC                                 |
| Ld46                        | <i>CYP4Q11</i>           | qContig09919F<br>qContig09919R                  | GCTGGAGATTAAGGCAGTACTCTGTG<br>TTTGCCATCTGTGCTCCTCAGT                             |
| Ld22                        | <i>CYP4Q<sup>a</sup></i> | qLdEB755786F<br>qLdEB755786R                    | TGTCGAGCTTCTACCCTTCAGTCA<br>CTGAAATGGAAGGCTGGCGTCAAA                             |
| Ld166                       | <i>CYP4Q<sup>b</sup></i> | qContig02266F<br>qContig02266R                  | GACAGTGTTCAACAACGCGTAGTAG<br>ATCACACATCTGCCACCACAACCTG                           |
| Ld119                       | <i>CYP4Q<sup>c</sup></i> | qContig03154F<br>qContig03154R                  | ATACCACCTCTACGGCCATTTGCT<br>GGGTCTTCTGTTGAATCTCCAAGG                             |
| Ld138                       | <i>CYP4<sup>a</sup></i>  | qContig04089F<br>qContig04089R                  | ATTGAATGGGTTGAGGAAGTGCC<br>TCAACCTGGCCAGTCCGTTGTATT                              |
| Ld133                       | <i>CYP4<sup>b</sup></i>  | qContig06673F<br>qContig06673R                  | GCAATCCCAATCCAAGCCAGTTGT<br>ACCAATCAGCACGGCAGTAGTTTC                             |
| Ld123                       | <i>CYP4<sup>c</sup></i>  | qContig09902F<br>qContig09902R                  | TTCAGCTCCTGATACATTGACGGC<br>CTCGCGTGTGAAAGGGAGTTGTTT                             |
| Ld72                        | <i>CYP4<sup>d</sup></i>  | qLdEB760335F<br>qLdEB760335R                    | CCATCGAATGTGATGGACTAATGAGG<br>TCGTCTTGTGTTACGAGTCCGTCT                           |
| Ld107                       | <i>CYP4<sup>e</sup></i>  | qContig10575F<br>qContig10575R<br>qContig02661R | CCAGTACCCGATCACAACTGGAA<br>CGGCCTAGGTTTGAATCTTATTGGC<br>ACGAACGTTGGTTTATACCGCTCG |
| Ribosomal protein L4        |                          | qLdEB761170*F<br>qLdEB761170R                   | AAAGAAACGAGCATTGCCCTTCCG<br>TTGTCGCTGACACTGTAGGGTTGA                             |
| Ribosomal protein L18       |                          | qLdEB761179F<br>qLdEB761179R                    | TAGAATCCTCAAAGCAGGTGGCGA<br>AGCTGGACCAAAGTGTTCCTACTGC                            |
| Elongation factor1 $\alpha$ |                          | qLdEB754313F<br>qLdEB754313R                    | AAGGTTTCCTTCAAGTATGCGTGGG<br>GCACAATCAGCTTGCATGTACCA                             |
| NADH dehydrogenase          |                          | qLdEB761955F<br>qLdEB761955R                    | TAGGATGGGACGGTTTGGGATTAG<br>GCAACATCGCCAATTCGGTTCCTT                             |
| Heat shock protein 70       |                          | qLdEB761546F<br>qLdEB761546R                    | ACCTCGATGGTCTCACCAGATG<br>GGACAGTGATGTCTGCGTTCCG                                 |

\*This EB number stands for the access number in NCBI database.
